1

2 **TRF1 prevents permissive DNA damage response, recombination and Break Induced**

3 **Replication at telomeres**

4

5 Rosa Maria Porreca<sup>1</sup>, Pui Pik Law<sup>1</sup>, Emilia Herrera-Moyano<sup>1</sup>, Roser Gonzalez-Franco<sup>1</sup>, Alex  
6 Montoya<sup>2</sup>, Peter Faull<sup>3</sup>, Holger Kramer<sup>2</sup> and Jean-Baptiste Vannier<sup>1#</sup>

7

8

9 1: Telomere Replication & Stability group, MRC-LMS, Faculty of Medicine, Imperial College  
10 London, Hammersmith Hospital Campus, London W12 0NN, UK.

11 2: Biological Mass Spectrometry & Proteomics, MRC-LMS, Hammersmith Hospital Campus,  
12 London W12 0NN, UK

13 3: The Francis Crick Institute, Proteomics Mass Spectrometry Science and Technology Platform,  
14 Midland Road, London NW1 1AT, UK

15

16 #: correspondence, requests for materials and Lead Author: [j.vannier@lms.mrc.ac.uk](mailto:j.vannier@lms.mrc.ac.uk)

17

18

## 19 **Abstract**

20 Telomeres are a significant challenge to DNA replication and are prone to replication stress and  
21 telomere fragility. The shelterin component TRF1 facilitates telomere replication but the molecular  
22 mechanism remains uncertain. By interrogating the proteomic composition of telomeres, we show  
23 that telomeres lacking TRF1 undergo protein composition reorganisation associated with a DNA  
24 damage response and chromatin remodelers. Surprisingly, TRF1 suppresses the accumulation of  
25 promyelocytic leukemia (PML) protein, BRCA1 and the SMC5/6 complex at telomeres, which is  
26 associated with increased Homologous Recombination (HR) and TERRA transcription. We  
27 uncovered a previously unappreciated role for TRF1 in the suppression of telomere recombination,  
28 dependent on SMC5 and also POLD3 dependent Break Induced Replication at telomeres. We propose  
29 that TRF1 facilitates S-phase telomeric DNA synthesis to prevent illegitimate mitotic DNA  
30 recombination and chromatin rearrangement.

31

## 32 **Introduction**

33 Telomeres are specialised nucleoprotein structures at the ends of chromosomes, composed of  
34 repetitive sequences (TTAGGG repeats in mammals) (Moyzis et al., 1988), long non-coding RNA  
35 called TERRA and six associated proteins, TRF1, TRF2, POT1a/b, RAP1 and TIN2, that form the  
36 shelterin complex (de Lange, 2005). These capping structures have the crucial function of maintaining  
37 genome stability by protecting the chromosome end from being recognised as DNA double strand  
38 breaks (DSBs) (Palm & de Lange, 2008). They also represent challenging structures for the  
39 replication machinery, which is associated to telomere fragile sites (Martinez et al., 2009; McNees et  
40 al., 2010; Sfeir et al., 2009; Vannier, Pavicic-Kaltenbrunner, Petalcorin, Ding, & Boulton, 2012).  
41 Telomere fragility is identified by the formation of multitelomeric signals (MTS), where telomeres  
42 appear as broken or decondensed, resembling the common fragile sites (CFS) observed at non

43 telomeric loci after treatment with aphidicolin (APH). TRF1 facilitates the progression of the  
44 replication fork at telomeres, by recruiting specialised DNA helicase BLM, which in turn resolve  
45 secondary structures, similar to fission yeast ortholog Taz1 (Lee, Arora, Wischnewski, & Azzalin,  
46 2018; Martinez et al., 2009; Miller, Rog, & Cooper, 2006; Sfeir et al., 2009).

47 During tumorigenesis, cancer cells can achieve replicative immortality by activation of telomere  
48 maintenance mechanisms. The majority of cancer cells reactivate telomerase, while a minority (10-  
49 15%) uses an alternative mechanism named ALT for alternative lengthening of telomeres (Bryan,  
50 Englezou, Dalla-Pozza, Dunham, & Reddel, 1997; Kim et al., 1994). Intriguingly, ALT is  
51 characterised by the appearance of ALT-associated PML bodies (APBs), specialised sites where a  
52 subset of telomeres co-localises with PML protein and several DNA repair and homologous  
53 recombination (HR) proteins (Draskovic et al., 2009; G. Wu, Lee, & Chen, 2000; Yeager et al., 1999).  
54 ALT telomeres can be maintained by more than one mechanism of recombination. Indeed, in yeast,  
55 two different ALT-like pathways have been described: Type I, requires Rad51 to mediate the invasion  
56 of a homologous sequence, while Type II is Rad51 independent and rely on Rad52 dependent  
57 elongation mechanism, which consists in the annealing of ssDNA regions. Both Type I and II  
58 mechanisms require the DNA polymerase Pol32, which initiates DNA synthesis for several kilobases,  
59 in a process known as Break Induced Replication (BIR) (Ira & Haber, 2002). Recently, multiple  
60 groups have revisited this Rad51 independent DNA synthesis repair pathway at mammalian ALT  
61 telomeres (Dilley et al., 2016; Garcia-Exposito et al., 2016; Roumelioti et al., 2016). Mammalian BIR  
62 is dependent on POLD3 and POLD4, subunits of DNA polymerase delta and orthologs of yeast Pol32.  
63 ALT cells present increased DNA damage response (DDR) and several studies have underlined the  
64 contribution of replication stress to ALT-mediated telomere extension (Arora et al., 2014; K. E. Cox,  
65 Marechal, & Flynn, 2016; Pan et al., 2017). However, the molecular mechanisms initiating  
66 recombination in ALT cells are still unclear.

67 In order to gain insight into the chromatin composition of telomeres undergoing replication  
68 stress, we performed Proteomics of Isolated Chromatin segments (PICh), using *TRF1* conditional  
69 knock-out Mouse Embryonic Fibroblasts (MEFs, telomerase positive). Surprisingly, we found that  
70 telomeres lacking TRF1 are enriched in SMC5/6, DNA polymerase  $\delta$  (POLD3), and chromatin  
71 remodeling factors known to be associated with ALT telomeres. These cells also present additional  
72 DNA damage and recombination hallmarks such as formation of APBs, mitotic DNA synthesis at  
73 telomeres, a feature of BIR, recruitment of chromatin remodeling factors and increased TERRA  
74 levels. Further investigation using specific shRNAs against the SMC5/6 complex or POLD3 revealed  
75 how these two complexes are key regulators of the recombination signature identified in *TRF1* deleted  
76 cells. Taken together, these results strongly identify TRF1 as a central player in preserving telomeric  
77 chromatin against HR, induced by DNA replication stress, and particularly POLD3 dependent-mitotic  
78 DNA synthesis.

79

## 80 **Results**

### 81 **Capture of TRF1 depleted telomeres by PICh reveals drastic changes in the chromatin** 82 **composition.**

83 To isolate and identify the chromatin composition of TRF1 depleted telomeres, we employed  
84 Proteomics of Isolated Chromatin segments (PICh), a powerful and unbiased technique that uses a  
85 desthiobiotinylated oligonucleotide complementary to telomeric repeat sequences to specifically pull  
86 down telomeric chromatin (Dejardin & Kingston, 2009). We performed PICh in MEFs harboring a  
87 *TRF1* conditional allele. MEFs lacking *TRF1* are well known to undergo replicative stress; however,  
88 they can grow for up to 8 days before entering senescence, making them optimal for investigating  
89 replication stress at telomeres (Martinez et al., 2009; Sfeir et al., 2009). Cells were transduced twice  
90 (day 0 and 3) with a CRE or GFP control adenovirus and collected 7 days after the first transduction,  
91 as indicated in the timeline (Figure 1A). Excision of exon 1 of *TRF1* by CRE recombinase (Sfeir et

92 al., 2009) resulted in the expected loss of TRF1 protein as determined by immunoblotting (Figure  
93 1B). Cells were fixed and isolation of telomeres was performed using a probe complementary to  
94 TTAGGG repeats or a scrambled probe as a negative control. Finally, telomeric chromatin was  
95 isolated from both control cells (wt) and *TRF1* deleted cells before mass spectrometry identification  
96 (Figure 1C). We identified a list of 1306 proteins that was subjected to refinement in order to remove  
97 unspecific bound proteins or contaminants found with the scrambled probe (see experimental  
98 procedure for detailed description). Based on the analysis of *label free* quantification (LFQ  
99 intensities), we found 119 proteins presenting a gain of abundance at TRF1 depleted telomeres  
100 ( $\text{Log}_2 > -2$ ) and 206 factors were displaced from these telomeres ( $\text{Log}_2 > 2$ ), considering that a cut-off  
101 for differential expression is set to  $\text{log}_2$  fold change ( $\text{TRF1 deletion/wt} > |2|$ ) and  $-\text{Log}(\text{p-value}) > 1$   
102 (Figure 1D). Amongst these 206 proteins, we found TRF1, as expected due to the knock-out of its  
103 gene, but also one component of the CST complex (CTC1), important player in the efficient restart  
104 of stalled replication forks at telomeres (Gu et al., 2012) and recruited through POT1b interaction (P.  
105 Wu, Takai, & de Lange, 2012). Interestingly, POT1b is also less abundant at TRF1 depleted telomeres  
106 (Figure 1D-E). On the other end, the group of 119 proteins enriched in *TRF1* deleted cells includes  
107 several factors involved in structural maintenance of chromosomes (SMC), HR and DNA damage  
108 response (Figure 1D-E-F), such as the MRN complex (MRE11, RAD50 and NBS1). The  
109 identification of 53BP1 recruited to TRF1 depleted telomeres (Figure 1D-F) acts as a positive marker  
110 for the specificity of this proteomic analysis, as reported before in (Martinez et al., 2009; Sfeir et al.,  
111 2009). Moreover, we could identify drastic and previously uncharacterised changes of the telomeric  
112 proteome at telomeres undergoing replication stress presented hereafter.

113

#### 114 **TRF1 suppresses APBs formation and HR at telomeres.**

115 Interestingly, *TRF1* deficient MEFs present a telomeric enrichment for factors involved in HR and  
116 chromatin remodeling (NurD complex, BRCA1, SMC5/6 and PML) that are usually abundant at ALT

117 telomeres (Figure 1D-2A) (Conomos, Reddel, & Pickett, 2014; Draskovic et al., 2009; Marzec et al.,  
118 2015; Potts & Yu, 2007). To validate the specific association of some of these factors with TRF1  
119 depleted telomeres in telomerase positive MEFs, we carried out chromatin immunoprecipitation  
120 (ChIP) experiments using ChIP-grade specific antibodies followed by telomeric dot-blot. TRF1  
121 antibody was used as a negative control for our experiment, while the recruitment of BRCA1, BAZ1b,  
122 and some subunits of the nucleosome remodeling and deacetylase (NurD) complex (p66a, MTA1,  
123 ChD4, zinc-finger protein ZNF827) was assessed. For all these factors, with the exception of p66a  
124 for which no statistical significance was achieved, we observed a specific enrichment at telomeres  
125 upon *TRF1* deletion (Figure 2B; Figure S1A-B). In addition, to confirm the presence of PML at  
126 replication stress induced telomeres, as suggested by our PICH data (Figure 2A), we performed  
127 immuno-FISH and scored for the formation of APBs. We observed a two-fold increase in the number  
128 of co-localisations between PML and telomeres in *TRF1*<sup>-/-</sup> MEFs compared to control cells (Figure  
129 2C). Overall these data demonstrate that telomeres undergoing replication stress favor the recruitment  
130 of chromatin remodeler, HR factors and the formation of APBs, considered a platform of  
131 recombination for chromosome ends (Cesare & Reddel, 2010). This suggests a role of TRF1 in  
132 suppressing recombination events as well as many other phenotypic features related to ALT. Hence,  
133 to test this hypothesis, we revisited the incidence of telomeric sister chromatid exchanges (T-SCE)  
134 using chromosome orientation FISH (CO-FISH) in *TRF1* deficient cells (Figure 2D). We identified  
135 an increase in T-SCE in *TRF1*<sup>-/-</sup> MEFs (2.8%) compared to control cells (0.4%) (Figure 2D). This  
136 result is at odds with previous publications where T-SCE events detected at TRF1 depleted telomeres  
137 were not significantly enriched, with only 1% of T-SCEs detected compared to 0.1% in wt cells  
138 (Martinez et al., 2009; Sfeir et al., 2009). In fact, this discrepancy might be explained by the difference  
139 in timing for the analysis of T-SCEs in *TRF1* deficient cells. Both publications report the lack of  
140 recombination effect by T-SCEs at 3 or 4 days after *TRF1* loss, while we generally carry our  
141 investigations at day 7. Therefore, we repeated the experiments in *TRF1*<sup>-/-</sup> cells at different time points

142 post infection: day 4 and day 7, finding respectively 1.6% and 2.8% of T-SCEs per chromosome end  
143 (Figure S2, left graph), indicating a lower % of T-SCE events happening at earlier time point. A  
144 second distinct difference with previous reports is the type of telomere signal exchanges that we  
145 analysed. As in Sfeir et al., 2009, all types of telomere signal exchanges (e.g. the exchanges appearing  
146 at single chromatids and the reciprocal exchanges at both chromatids) were considered. However,  
147 Martinez et al., 2009 only refers to reciprocal exchanges at both chromatids. Thus, we next classified  
148 T-SCEs detected in *TRF1* deficient MEFs into these two different types (single and double) and found  
149 that 4 days post infection only T-SCEs at single chromatids were significantly increased (Figure S2,  
150 right graph), while the reciprocal exchanges were not enhanced at TRF1 depleted telomeres (Figure  
151 S2, middle graph). Therefore, our detailed analysis of the nature and timing of T-SCEs in TRF1  
152 deficient MEFs is in line with the previous literature. Moreover, it demonstrates the unappreciated  
153 role of TRF1 in suppressing HR and suggests that the initial recombination events happening at  
154 replication stressed telomeres could be generated by the BIR pathway (single chromatid exchanges)  
155 (Roumelioti et al., 2016).

156

### 157 **TRF1 depletion causes TERRAs upregulation.**

158 Since depleting telomeres of TRF1 induces the formation of APBs and the increase of HR, we next  
159 decided to revisit the role of TRF1 in telomere transcription, as TERRA molecules are proposed to  
160 regulate telomere recombination (Yu et al., 2014). Previous studies have reported *in-vivo* interactions  
161 between TRF1 and TERRA (Deng, Norseen, Wiedmer, Riethman, & Lieberman, 2009) and also a  
162 possible transcriptional regulation by TRF1 through a mechanism involving RNA polymerase II -  
163 TRF1 interaction (Schoeftner & Blasco, 2008). However, the role of TRF1 regulating telomere  
164 transcription appears complex since contrasting results have been reported by different groups in both  
165 human and mouse cell lines (Lee et al., 2018; Schoeftner & Blasco, 2008; Sfeir et al., 2009). We  
166 performed both RNA dot-blot and Northern-blot analyses showing a significant increase in TERRA

167 molecules upon loss of *TRF1* in immortalised MEFs, 7 days after transduction (Figure 3A-B) but also  
168 at earlier time point (day 4) and in primary MEFs (Figure S3A-B-C). Collectively, we identify an  
169 increase in TERRA molecules upon TRF1 removal from telomeres, confirming transcriptional and  
170 telomeric chromatin changes in TRF1 depleted cells. Particularly, the TERRAs molecules increasing  
171 upon *TRF1* deletion have high molecular weight and can only be detected when an alkaline treatment  
172 is performed during Northern-blotting (Figure 3B; S3D). In addition, we carried out TERRA-FISH  
173 (Figure 3C), confirming a significant increase in numbers and intensity of TERRA foci per nucleus  
174 deficient for *TRF1* (Figure 3C). Taken together, these results suggest that TRF1 dependent replication  
175 stress at telomeres changes the telomeric chromatin composition by recruiting specific chromatin  
176 remodelers, which directly or indirectly affect telomere transcription and contribute to the formation  
177 of APBs, platform of recombination. The presence of these ALT-hallmarks suggests that TRF1  
178 depleted telomeres present some similarities with ALT telomeres. However, the absence of telomere  
179 heterogeneity, c-circle formation and still presence of telomerase activity (Figure S4A-B-C) also  
180 suggest that this ALT-like phenotype is not complete.

181

### 182 **TRF1 suppresses mitotic DNA synthesis at telomeres.**

183 Since the denaturing CO-FISH experiments in *TRF1* deficient cells identified single chromatid  
184 exchanges that are proposed to be reminiscent of BIR events, an HR alternative pathway required in  
185 G2-M phase (Roumelioti et al., 2016), we tested whether TRF1 depleted telomeres trigger non S-  
186 phase DNA synthesis. We performed a pulse with 5-bromo-2-deoxyuridine (BrdU) for 2 hours  
187 (Figure 4A) before carrying out BrdU immunofluorescence at telomeres in interphase cells (Figure  
188 4B-C). Only non S-phase cells were counted in this experiment, based on the formation of clear BrdU  
189 foci (Dilley et al., 2016; Nakamura, Morita, & Sato, 1986) (Figure 4B). *TRF1*<sup>-/-</sup> MEFs display  
190 elevated BrdU incorporation at telomeres, showing eight times more telomere synthesis (positive  
191 cells with more than 5 foci) compared to control cells (Figure 4C). To investigate DNA synthesis



192 happening exclusively in mitosis, so-called MiDAS (Minocherhomji et al., 2015), we performed a  
193 similar experiment in metaphases. After incubating wt and *TRF1* deficient MEFs with 5-ethynyl-2-  
194 deoxyuridine (EdU) and colcemid for 1-hour, mitotic cells were collected to analyse EdU  
195 incorporation on metaphase chromosomes (Figure 4A). We scored for telomeric and non-telomeric  
196 EdU foci (mitotic DNA synthesis) and found that CRE induced cells had a significant increase in  
197 telomeric mitotic DNA synthesis compared to the GFP control cells (Figure 4D). This result confirms  
198 that TRF1 depleted telomeres present an increased level of non-S-phase DNA synthesis, similar to  
199 what is observed in ALT cells. In addition, analysis of EdU incorporation in metaphase spreads  
200 allowed us to distinguish between conservative BIR associated DNA synthesis and HR semi-  
201 conservative DNA synthesis (Min, Wright, & Shay, 2017). In the first case, EdU would be labeled  
202 on a single chromatid (Figure 4E, upper panel), while in the latter, EdU would localise to both  
203 chromatids (Figure 4E, bottom panel). Thus, to assess the mechanism of DNA synthesis in *TRF1*  
204 deleted cells, the pattern of EdU incorporation on metaphase chromosomes was further investigated  
205 (Figure 4F). Non-telomeric (upper panel) and telomeric (middle panel) EdU foci formed mainly on a  
206 single chromatid. In fact, 72% of the mitotic DNA synthesis at non-telomeric sites localised to a  
207 single chromatid, while the remaining 28% of the signal was present at both chromatids (Figure 4F,  
208 upper panel). This result is even more striking when EdU signal was restricted to telomeres, with  
209 almost all the co-localisation being present at single chromatids (95%). These observations suggest  
210 that TRF1 is crucial for the suppression of mitotic DNA synthesis mediated by BIR at telomeres.

211

### 212 **Mitotic DNA synthesis at replication stressed telomeres is POLD3 dependent.**

213 BIR is a recombination dependent process reinitiating DNA replication when one end of a  
214 chromosome shares homology with the template DNA, leading to conservative DNA synthesis, which  
215 is dependent on RAD52 and POLD3 (*pol32* homolog in yeast) (Bhowmick, Minocherhomji, &  
216 Hickson, 2016; Sotiriou et al., 2016). ALT telomeres have recently been reported to be elongated by

217 BIR, in a POLD3 and SMC5-dependent manner (Dilley et al., 2016; Min et al., 2017; Potts, Porteus,  
218 & Yu, 2006). Since the SMC5/6 complex was exclusively enriched in PICH purified TRF1 depleted  
219 telomeres (Figure 2A), we further investigated the role of POLD3 and SMC5 in BIR DNA synthesis  
220 observed in *TRF1*<sup>-/-</sup> MEFs. We generated *TRF1*<sup>F/F</sup> cells deficient in *SMC5* or *POLD3* using specific  
221 shRNAs. Upon infection with GFP or CRE adenovirus, we produced respectively single or double  
222 deletion *TRF1-SMC5* or *TRF1-POLD3* cell lines. Loss of SMC5 and TRF1 expression were  
223 confirmed by immunoblotting (Figure 5A-B), while mRNA levels of POLD3 were analysed by RT-  
224 QPCR (Figure 5C). We first confirmed that these deletions did not elicit a cell cycle arrest. We only  
225 noticed a slight decrease in population doublings in the double mutants, while all cell lines were still  
226 able to properly divide and incorporate EdU (Figure S5A-B). Thus, we carried out EdU-FISH in these  
227 cells to check for the presence of BIR (Figure 5D). We found that the enrichment of DNA synthesis  
228 at telomeres in *TRF1* deleted cells was suppressed in the double mutant *TRF1-POLD3*, while the  
229 double mutant *TRF1-SMC5* revealed similar telomeric DNA synthesis when compared to the single  
230 *TRF1* mutant (Figure 5E). First, these results confirm that BIR is the molecular mechanism taking  
231 place at TRF1 depleted telomeres. Second, SMC5 appears to be dispensable for BIR dependent DNA  
232 synthesis at these replication-stressed chromosome ends.

233

234 **SMC5 and POLD3 are required for APBs formation and recombination at TRF1 deficient**  
235 **telomeres.**

236 We further examined whether POLD3 and SMC5 could be responsible not only for the BIR dependent  
237 DNA synthesis but also for the other ALT-like phenotypes observed at TRF1 deficient telomeres.  
238 Since TRF1 is well known to suppress telomere fragility or MTS (Sfeir et al., 2009) (Martinez et al.,  
239 2009), we first investigated the role of POLD3 and SMC5 in the induction or maintenance of this  
240 telomere replication stress in the double mutants (Figure S6A-B). As previously reported, TRF1  
241 depleted telomeres present approximately 20% of fragile telomeres per chromosomes (Figure S6C).

242 We could not detect any changes in the frequency of telomere fragility in *TRF1-POLD3* nor *TRF1-*  
243 *SMC5* mutants (Figure S6C) suggesting that neither *POLD3* nor *SMC5* are involved in the  
244 mechanism that gives rise to telomere fragility. As APBs were increased in *TRF1* deleted cells (Figure  
245 2C), we investigated the roles of *POLD3* and *SMC5* in the formation of these specialised bodies. A  
246 significant reduction in number of cells having co-localising PML-telomere foci was detected in the  
247 double mutant cells *TRF1-POLD3* and *TRF1-SMC5* (Figure 6A) suggesting that *POLD3* and *SMC5*  
248 are necessary for the formation of these recombination machinery loci. We next explored the  
249 involvement of these two factors in HR by scoring for T-SCE (Figure 6B), discriminating also  
250 between the two categories of T-SCEs (single or double exchanges) in the analysis of the double  
251 mutants *TRF1-SMC5* and *TRF1-POLD3*. We found that both types of exchanges are dependent on  
252 *SMC5* and *POLD3* (Figure 6B- S6D). Finally, we assessed TERRA expression levels in the double  
253 mutants. Surprisingly, only the absence of *POLD3* was able to rescue the increase in TERRA levels  
254 detected in *TRF1* deficient cells, while the *SMC5* single mutant increased TERRA expression (Figure  
255 6C). Collectively, our data indicate that both *POLD3* and *SMC5* are essential for T-SCE and APBs  
256 formation, but only *POLD3* is required to maintain increased TERRA levels and BIR observed in  
257 *TRF1* deficient cells. This suggests that *POLD3* and *SMC5* have separate roles or act at different  
258 stages of the recombination events happening at *TRF1* depleted telomeres, advocating also an  
259 intriguing connection between TERRA and BIR. We speculate that TERRA could trigger the  
260 homology search by stimulating the initial steps of BIR in which *POLD3* is involved (Figure 7).

261

## 262 **Discussion**

263 Faithful DNA replication of genetic information is essential for the maintenance of genome stability  
264 and integrity. Specific genomic loci, including fragile sites and telomeres, represent major obstacles  
265 to DNA replication progression and/or completion. Fragile sites have the propensity to form visible  
266 gaps or breaks on chromosome in metaphase spreads of cell lines from patients having fragile X-

267 syndrome or Huntington's disease (reviewed in(Minocherhomji & Hickson, 2014; Minocherhomji et  
268 al., 2015)). It is well documented that CFS expression is exacerbated in cells grown under low to mild  
269 replication stress, for example upon inhibition of DNA polymerase with APH (Minocherhomji &  
270 Hickson, 2014; Minocherhomji et al., 2015). Fragile sites are hotspots for deletions, chromosome  
271 rearrangements and are associated with an increased frequency of homologous recombination (Glover  
272 & Stein, 1987). Over the last decade, telomeres have been identified as APH induced fragile sites  
273 displaying the standard phenotype of multiple spatially distinct telomere foci (MTS or telomere  
274 fragility) on metaphase spreads (Martinez et al., 2009; Sfeir et al., 2009). Various factors suppress  
275 MTS and thereby facilitate DNA replication at telomeres; including (Zaaijer, Shaikh, Nageshan, &  
276 Cooper, 2016) the shelterin protein TRF1 (Martinez et al., 2009; Sfeir et al., 2009), the DNA helicases  
277 RTEL1 (Vannier et al., 2012), BLM and WRN (Barefield & Karlseder, 2012), Topoisomerase  
278 TopoIIa (d'Alcontres, Palacios, Mejias, & Blasco, 2014) and Rif1 (Zaaijer et al., 2016). High levels  
279 of DNA damage and telomere fragility are characteristics of ALT cells (Cesare et al., 2009) (Min et  
280 al., 2017), presenting several DNA repair and damage factors in APBs (Draskovic et al., 2009; G.  
281 Wu et al., 2000; Yeager et al., 1999), indication of elevated telomeric stress in these cells. Therefore,  
282 it has been hypothesized that ALT mechanism arises from persistent replication stress, which can be  
283 resolved by the initial collapse of the replication fork, subsequently offering substrates for HR repair  
284 mechanisms dependent on homology search and telomere synthesis as reported with BIR pathway  
285 (Dilley et al., 2016).

286 In this study, we report that replication stress generated at TRF1 depleted telomeres in telomerase  
287 positive MEFs is associated with the recruitment of ALT signature factors including PML, subunits  
288 of the NuRD complex, BRCA1 and SMC5/6 complex. We suggest that the formation of permissive  
289 telomeric chromatin enables transcription of telomeric sequences into TERRAs and increases  
290 recombination as measured by T-SCEs, in a POLD3 and SMC5/POLD3 dependent manner,  
291 respectively. Moreover, we detect mitotic DNA synthesis at TRF1 depleted telomeres, which is

292 dependent on POLD3 but not SMC5. Collectively, the presence of replication stress, recombination,  
293 APBs formation, TERRA increase and recruitment of specific chromatin factors, suggest a strong  
294 analogy between MEFs telomeres deleted for TRF1 and ALT telomeres, supporting the hypothesis  
295 that replicative stress could be the source of ALT initiation.

296 We suggest that chromatin remodeling factors such as NuRD-ZNF827 are recruited to TRF1 deficient  
297 telomeres to counteract the shelterin instability. This may be explained by analogy with ALT  
298 telomeres where telomeric DNA sequence is interspersed with variant repeats (Conomos et al., 2012;  
299 Marzec et al., 2015), which are suggested to cause displacement of shelterin proteins (Conomos,  
300 Pickett, & Reddel, 2013), thus increasing replication stress and DDR. In this scenario, nuclear  
301 receptors bind the interspersed variant repeats and recruit several chromatin remodeling factors  
302 including the NuRD complex, which can further alter the telomere architecture by increasing telomere  
303 compaction (Conomos et al., 2014); perhaps a transient state before stimulating telomere associations  
304 and generating more 'open' recombination permissive conditions at telomeres. In line with our  
305 findings, repressive chromatin at DSBs has been proposed to facilitate homology search and promote  
306 recruitment of HR proteins like BRCA1 (Khurana et al., 2014). In addition to BRCA1, we have  
307 identified through PICh analysis the SMC5/6 complex specifically recruited at *TRF1* deficient  
308 telomeres. We demonstrate that this complex plays the same role at replication induced telomeres as  
309 in ALT cells, targeting telomeres to PML bodies (APBs) and facilitating telomeric HR at these sites  
310 (Potts et al., 2006), since double mutant *SMC5-TRF1* disrupts formation of APBs and reduces T-  
311 SCEs events. However, we were unable to fully induce ALT in *TRF1* deficient MEFs, as they display  
312 neither C-circles nor heterogeneity in telomere length and telomerase is still active. The latter could  
313 act as a stabiliser of telomeric DNA ends generated during fork restart (Tong et al., 2015), similarly  
314 to what happens in *RTEL1*<sup>-/-</sup> MEFs (Margalef et al., 2018) and in human *RTEL1* deficient cells with  
315 long telomeres (Porreca et al., 2018).

316 Persistent DNA damage in ALT cells is suggested to originate from telomeric replication  
317 stress, which is proposed to be resolved by BIR in a POLD3 dependent manner (Dilley et al., 2016;  
318 Min et al., 2017; Roumelioti et al., 2016). Our results show that TRF1 is a major suppressor of  
319 telomeric replication stress and consequently of POLD3 dependent BIR. *TRF1* deficient telomeres  
320 present slower movement of S-phase replication forks, measured by molecular combing (Sfeir et al.,  
321 2009). The slower replication rates at telomeres is proposed to be a consequence of the hindrance of  
322 the replication forks by DNA secondary structures, including formation of G-quadruplexes on the  
323 lagging strand template or RNA-DNA hybrids. In the absence of TRF1, BLM is unable to be recruited  
324 to replicated telomeres and to open DNA secondary structures (Lee et al., 2018; Zimmermann, Kibe,  
325 Kabir, & de Lange, 2014). Based on our results, we propose that in the absence of TRF1, POLD3  
326 dependent BIR bypasses the stalled replication fork during G2/M phase.

327 Recent studies identified BIR as a mechanism to bypass RNA-DNA hybrids in a Rad52 and Pol32  
328 dependent manner in yeast (Amon & Koshland, 2016; Neil, Liang, Khristich, Shah, & Mirkin, 2018).  
329 This mechanism is also conserved in human cells where POLD3 is necessary for the restart of stalled  
330 replication forks at RNA-DNA hybrids (Tumini, Barroso, Calero, & Aguilera, 2016). Altogether, we  
331 propose that increased TERRAs levels at TRF1 depleted telomeres could form RNA-DNA hybrids  
332 that are bypassed by POLD3 dependent BIR (Figure 7). This is in agreement with recent findings  
333 showing that TRF1 suppresses R-loop formation mediated by TRF2 (Lee et al., 2018). In contrast to  
334 Pold3, SMC5 acts as inhibitor of TERRA accumulation, as its absence is causing a significant  
335 increase in TERRA levels. This result is reminiscent of the role of yeast Smc5 in facilitating the  
336 resolution of toxic recombination intermediates at RNA-DNA hybrids generated by the helicase  
337 Mph1 (Chen et al., 2009; Lafuente-Barquero et al., 2017). We also describe a role of SMC5 in  
338 promoting T-SCEs, but not MiDAS formation (in contrast to Pold3), in the absence of TRF1. These  
339 results are indicating an exclusive function of SMC5 in HR at replicative-stressed telomeres, perhaps  
340 ensuring the right balance between accumulation and removal of HR-dependent intermediates formed

341 during DNA repair (Aragon, 2018). On the other hand, the lack of Smc5 in promoting MiDAS seems  
342 in apparent contradiction with a recent observation in ALT cells (Min et al., 2017), where telomeric  
343 MiDAS is decreased in SMC5/6-depleted Saos2 cells. We speculate, this difference is due to an  
344 imbalance of factors used for ALT maintenance, compared to the early events observed in our  
345 conditional system after only few population doublings. Therefore, we cannot rule out a possible role  
346 of SMC5/6 in promoting MiDAS at a later stage, similar to the one observed in ALT maintenance.

347 Along with MUS81 structure specific nuclease, POLD3 and POLD4 subunits of the DNA  
348 polymerase delta are essential for CFS expression observed in human cells under replication stress  
349 (Minocherhomji et al., 2015; Tumini et al., 2016). To our surprise, *TRF1-POLD3* double mutant did  
350 not show any suppression of telomere fragility, indicating key differences in the mechanism  
351 generating these phenotypes.

352 In conclusion, our analysis of TRF1 function provides a molecular understanding of the  
353 level of protection that this shelterin protein offers at telomeres. The role of TRF1 in facilitating  
354 DNA replication at telomeres was already described but only until a certain extent. Surprisingly, we  
355 establish that TRF1 is essential for the suppression of early ALT-like signature events including  
356 heterochromatin remodeling, telomeric transcription (TERRAs), APBs formation and increased  
357 POLD3-BIR dependent telomeric recombination.

358

## 359 **Online Methods**

### 360 ***Cell culture, viral transductions and transfections with siRNAs***

361 TRF1 conditional knock-out MEFs (SV40-immortalised) were described previously (Martinez et al.,  
362 2009; Sfeir et al., 2009). Cells were cultured at 37°C in 5%CO<sub>2</sub>, using DMEM medium supplemented  
363 with 10% FCS (Sigma F2442). To achieve TRF1 deletion, cells were infected twice at 72h interval  
364 with Ad5-CMV-CRE (m.o.i. of 50) and harvested 3 or 4 days after the second infection.

365 pLKO.1-puromycin lentiviral vectors containing shRNAs for SMC5 (sequence  
366 CCCATAATGCTCACGATTAAT, Sigma), POLD3 (GCATATACTCATGTGTGGTTT,  
367 Dharmacon) or GAPDH (CTCATTTCCTGGTATGACA, Open biosystems) were introduced by  
368 infection of lentivirus-containing supernatant from 293FT cells. Puromycin selection was performed  
369 for 3 weeks at 2µg/ml and several clones were expanded and cultured before screening them for  
370 knock-down efficiency.

### 371 ***Western blot***

372 Cells were scraped in cold PBS, spun down and incubated in lysis buffer (NaCl 40 mM ;Tris 25 mM,  
373 pH 8; MgCl 2 mM; SDS 0.05%; Benzonase 1µl/2ml; Complete protease inhibitor cocktail, EDTA-  
374 free, Roche) for 10 min on ice. The lysates were sheared 10 times by forcing it through a 25G needle  
375 and left on ice for another 10 min. 35 µg of protein lysates were denatured for 10 min at 95°C after  
376 addition of Laemmli buffer 4X (50mM Tris pH7; 100mM DTT; 2%SDS; 0.1%bromophenol blue;  
377 10% glycerol), separated on 4-12% Bis-Tris gels (Invitrogen) and transferred onto a nitrocellulose  
378 membrane (Amersham Protran 0.2µm NC). Rabbit anti-TRF1 (gift from Titia de Lange) and rabbit  
379 anti-SMC5 (gift from Jo Murray) antibodies were diluted in PBST (PBS1x; 0.1 % Tween-20, Sigma-  
380 Aldrich) with 5% non-fat milk. Following incubations with HRP-coupled secondary antibodies  
381 signals were visualised using ECL II kit (Pierce) and x-ray film exposure (Amersham Hyperfilm  
382 ECL). Beta-actin antibody was used for normalisation (Abcam, ab8226).

### 383 ***Quantitative RT-PCR***

384 RNA extraction was carried out using RNeasy Mini Kit (Qiagen). 500ng of RNA were subjected to  
385 reverse transcription using random hexamer primers and cDNA Synthesis Kit (Roche) according to  
386 the manufacturer's protocol. Quantitative PCR was performed using QuantiTect SYBR Green PCR  
387 Master Mix and the following primers: mouse POLD3 with antisense 5'-  
388 ACACCAAGTAGGTAACATGCAG-3' and sense 5'-AAGATCGTGACTTACAAGTGGC-3'  
389 sequences; Mouse Actin with antisense 5'-CCAGTTGGTAACAATGCCATGT-3' and sense 5'-



390 GGCTGTATTCCCCTCCATCG-3' sequences; The PCR cycles were as follows: 95°C for 15 min,  
391 95°C for 15 sec, 55°C for 30 sec , 72°C for 30 sec for 44 cycles.

### 392 ***Telomeric Chromatin Isolation by PICh***

393 PICh was carried out as previously described (Dejardin & Kingston, 2009) using the following  
394 2'Fluoro-RNA probes for hybridisation: Destiobiotin-108 atom tether-  
395 UUAGGGUUAGGGUUAGGGUUAGGGt (Telo probe); Destiobiotin-108 atom tether-  
396 GAUGUGGAUGUGGAUGUGGAUGUGg (Scramble probe).

### 397 ***Gel & post digestion processing***

398 Gels were processed using a variant of the in-gel digestion procedure as described in (Shevchenko,  
399 Tomas, Havlis, Olsen, & Mann, 2006). Briefly, gel sections were excised and chopped into uniform  
400 cubes, followed by de-staining with 50/50, 50mM ammonium bicarbonate  
401 (AmBic)/acetonitrile(ACN). Gel sections were then dehydrated with 100% ACN followed by the  
402 subsequent sequential steps: reduction with 10mM dithiothreitol (DTT) at 56°C for 30 minutes in the  
403 dark, dehydration, alkylation with 55mM iodoacetamide (IAM) at RT for 20 minutes in the dark and  
404 dehydration. Gel sections were finally re-hydrated with a 40mM AmBic, 10% ACN solution  
405 containing 500ng of Trypsin Gold (Promega, V5280) and incubated overnight at 37°C. Recovered gel  
406 digest extracts were dried on a speed-vac, reconstituted with 99/1, H<sub>2</sub>O/ACN + 0.1% FA and de-  
407 salted using a standard stage tip procedure using C18 spin tips (Glygen Corp, TT2C18). Dried gel  
408 digest peptide extracts solubilised in 25µl of 0.1% trifluoroacetic acid (TFA) and clarified solution  
409 transferred to auto sampler vials for LC-MS analysis.

### 410 ***Mass spectrometry analysis***

411 Peptides were separated using an Ultimate 3000 RSLC nano liquid chromatography system (Thermo  
412 Scientific) coupled to a LTQ Velos Orbitrap mass spectrometer (Thermo Scientific) via an EASY-  
413 Spray source. 6µL of sample was loaded in technical duplicates onto a trap column (Acclaim PepMap  
414 100 C18, 100µm × 2cm) at 8µL/min in 2% acetonitrile, 0.1% TFA. Peptides were then eluted on-line

415 to an analytical column (EASY-Spray PepMap C18, 75 $\mu$ m  $\times$  25cm). Peptides were separated using a  
416 linear 120 minute gradient, 4-45% of buffer B (composition of buffer B– 80% acetonitrile, 0.1%  
417 formic acid). Eluted peptides were analysed by the LTQ Velos operating in positive polarity using a  
418 data-dependent acquisition mode. Ions for fragmentation were determined from an initial MS1 survey  
419 scan at 15000 resolution (at m/z 200), followed by Ion Trap CID (collisional induced dissociation) of  
420 the top 10 most abundant ions. MS1 and MS2 scan AGC targets set to 1e6 and 1e4 for a maximum  
421 injection time of 500ms and 100ms respectively. A survey scan m/z range of 350 – 1500 was used,  
422 with a normalised collision energy set to 35%, charge state rejection enabled for +1 ions and a  
423 minimum threshold for triggering fragmentation of 500 counts.

#### 424 ***Data analysis***

425 All data files acquired were loaded into MaxQuant(J. Cox et al., 2014) version 1.6.0.13 analysis  
426 software. Raw files were combined into an appropriate experimental design to reflect technical and  
427 biological replicates. The LFQ algorithm and match between runs settings were selected. Data were  
428 searched against the UniProt Reference Proteome Mus musculus protein database (UP000000589),  
429 downloaded on 16th January 2019 from the UniProt website. The database contains 17,002 reviewed  
430 (Swiss-Prot) & 37,186 un-reviewed (TrEMBL) protein sequences. MaxQuant also searched the same  
431 database with reversed sequences so as to enable a 1 % false discovery rate at peptide and protein  
432 levels. A built-in database of common protein contaminants was also searched.

433 Upon completion of the search, the “proteingroups.txt” output file was loaded in Perseus version  
434 1.4.0.2. Contaminant and reverse protein hits were removed. LFQ intensities were log<sub>2</sub> transformed.  
435 Data were group categorised to “Scramble”, “Telomere” or “Deletion”. Data were filtered for a  
436 minimum of 3 valid LFQ intensity values in at least one group. Missing values (NaN) were imputed  
437 from a normal distribution with default values.

#### 438 ***FISH and CO-FISH on metaphase spreads***

439 For metaphase spread preparation, cells were incubated for 60 minutes with 10ng/ml colcemid  
440 (Roche). Cells were harvested, swollen in 75 mM KCl solution for 15 min at 37°C, fixed in  
441 ethanol/acetic acid solution (3:1, v/v) and washed three times with the same fixing solution.  
442 Suspensions of fixed cells were dropped onto glass slides and dried overnight before performing FISH  
443 experiments.

444 Q-FISH and CO-FISH procedures were performed as previously described (Ourliac-Garnier  
445 & Londono-Vallejo, 2011). Briefly, metaphase spreads were fixed in 4% formaldehyde for 2 min,  
446 washed 3 × 5 min in PBS 1x, treated with pepsin (1 mg/ml in 0.05 M citric acid pH 2) for 10 min at  
447 37°C, post-fixed for 2 min, washed and incubated with ethanol series (70%, 80%, 90%, 100%).  
448 Hybridising solution containing Cy3-O-O-(CCCTAA)<sub>3</sub> probe (PNA bio) in 70% formamide, 10 mM  
449 Tris pH 7.4 and 1% blocking reagent (Roche, 11096176001) was applied to each slide, followed by  
450 denaturation for 3 min at 80°C on heating block. After 2 hour hybridisation at RT, slides were washed  
451 twice 15 min in 70% formamide, 20 mM Tris pH 7.4, followed by three washes of 5min in 50 mM  
452 Tris pH 7.4, 150 mM NaCl, 0.05% Tween-20, dehydrated in successive ethanol baths and air-dried.  
453 Slides were mounted in antifade reagent (ProLong Gold, Invitrogen) containing DAPI and images  
454 were captured with Zeiss microscope using Carl Zeiss software. Telomeric signals were quantified  
455 using the ImageJ software (Fiji).

456 For CO-FISH, the cells were treated with 10µM BrdU:BrdC (3:1) for 16h, followed by  
457 colcemid treatment as above. Prior to hybridisation slides were treated with RNase A (0.5µg/ml in  
458 PBS) for 10 min at 37°C, incubated with Hoechst (1 µg/ml in 2XSSC) for 10 min at RT, exposed to  
459 UV light for 1h and treated with *ExoIII* to degrade the neosynthesised DNA strand containing  
460 BrdU/C. Slides were next dehydrated through ethanol series, hybridising solution containing TelG-  
461 FAM probe (Exiqon) in 50% formamide, 2XSSC, 1% blocking reagent was applied to each slide,  
462 followed by denaturation for 3 min at 80°C on heating block and hybridisation for 2 hours in the dark.  
463 Slides were washed 2 x 15 min in 50% formamide, 2XSSC and 3 × 5 min in 50 mM Tris pH 7.4, 150

464 mM NaCl, 0.05% Tween-20. Finally, slides were dehydrated, incubated with TelC-cy3 probe for 2  
465 hours, followed by the steps described above in the FISH protocol.

#### 466 ***Immunofluorescence-FISH***

467 Cells seeded on slides were permeabilised with Triton X-100 buffer (0.5% Triton X-100; 20mM Tris  
468 pH8; 50mM NaCl; 3mM MgCl<sub>2</sub>; 300mM sucrose) at RT for 5min and then fixed in 3%  
469 formaldehyde/2% sucrose in PBS1X for 15min at RT and washed three times in PBS1X. After a 10  
470 min permeabilisation step and a wash in PBS1X, nuclei were incubated with blocking solution (10%  
471 serum in PBS1X) for 30 min at 37°C and stained with specific primary antibodies: rabbit anti-PML  
472 (1/200, a gift from Paul Freemont); rabbit anti-53bp1 dilution (1/400, Bethyl A300-272A). After three  
473 washes in PBS1X, nuclei were incubated with secondary donkey anti-rabbit Alexa 488 antibody  
474 (1/400, Life Technologies) for 40 min at 37°C, washed three times in PBS1X, post fixed 10 min and  
475 hybridised with TelC-cy3 PNA probe as described in FISH protocol.

476 EdU labeling and staining were performed as previously reported (Minocherhomji et al.,  
477 2015). Briefly, cells were incubated 1h with EdU (100µM) and colcemid (10ng/ml), followed by  
478 metaphase spread preparation. For EdU staining, the steps of fixation, pepsin treatment and  
479 dehydration in ethanol serial dilutions were carried out as in FISH protocol, followed by Click IT  
480 assay using EdU-Alexa Fluor 488 imaging kit according to the manufacturer's instructions (Thermo  
481 Fisher). Metaphases were post-fixed and hybridised with TelC-cy3 PNA probe.

#### 482 ***TERRA-FISH***

483 TERRA-FISH experiment was carried out as previously described (Azzalin, Reichenbach, Khoriaili,  
484 Giulotto, & Lingner, 2007) with minor modifications. Briefly cells were permeabilised 5 min with  
485 cold CSK buffer (10mM Pipes pH7; 100mM NaCl; 300 mM sucrose; 3mM MgCl<sub>2</sub>; 0.5% Triton X-  
486 100 and 10mM of inhibitor Ribonucleoside Vanadyl Complex). After a wash in PBS1X, cells were  
487 fixed for 10 min in 3% formaldehyde solution and washed three times with PBS, followed by  
488 Immunofluorescence with primary anti-TRF2 (dilution 1/10.000, 1254 ab gift from T. de Lange).

489 Nuclei were then incubated with secondary donkey anti-rabbit Alexa 488 antibody (1/400, Life  
490 Technologies) for 40 min at 37°C, washed three times in PBS1X and post fixed for 10 min. After  
491 incubation with ethanol series (70%, 80%, 90%, 100%) slides were dried O/N in the dark. TelC-cy3  
492 PNA probe was used for TERRA detection and after incubation for 2hours at RT, slides were washed  
493 3 x 5 min in 50% formamide, 2XSSC at 39°C, 3 × 5 min in 2XSSC at 39°C and a final wash in  
494 2XSSC at RT. Slides were dehydrated in successive ethanol baths, air-dried and mounted in antifade  
495 reagent (ProLong Gold, Invitrogen) containing DAPI and images were captured with Zeiss  
496 microscope using Carl Zeiss software. Quantification was performed using CellProfiler 3.1.8  
497 software.

#### 498 ***Chromatin Immunoprecipitation (ChIP)***

499 Chromatin preparation and ChIP experiments were performed as previously described (Porreca et al.,  
500 2018) with the following modifications: sonication of chromatin was performed for 20 min (30 sec  
501 on / 30 sec off) in a Diagenode water bath-sonicator at high speed. 20-50 µg of chromatin was diluted  
502 10 times in ChIP dilution buffer (20 mM Tris-HCl pH 8, 150 mM KCl, 2 mM EDTA pH 8, 1% Triton  
503 X-100, 0.1% SDS), pre-cleared with Dynabeads (Invitrogen) and incubated overnight with 2-5 µg of  
504 antibody (listed in Table S1).

#### 505 ***RNA dot blot***

506 RNA extraction was carried out using RNeasy Mini Kit (Qiagen), according to the manufacturer  
507 instructions. 2µg of RNA were denatured in 0.2 M NaOH by heating at 65°C for 10 min, incubated  
508 5min on ice and spotted onto a positively charged Biodyne B nylon membrane (Amersham Hybond,  
509 GE Healthcare). Membranes were UV-crosslinked (Stratalinker, 2000 kJ) and baked for 45 min at  
510 80°C, followed by hybridisation at 42°C with digoxigenin (DIG)-labeled telomeric C-rich  
511 oligonucleotide TAA(CCCTAA)<sub>4</sub>, prepared using 3' end labeled kit (Roche). Signal was revealed  
512 using the anti-DIG-alkaline phosphatase antibodies (Roche) and CDP-Star (Roche) following the  
513 manufacturer's instructions. Images were captured using the Amersham Imager 680 (GE Healthcare)

514 and analysed using the Image Studio Lite software.

515 18s rRNA probe with sequence: 5'-CCATCCAATCGGTAGTAGCG was used for normalisation.

### 516 *Northern Blot*

517 10µg of RNA was denatured for 10 min at 65°C in sample buffer (50% formamide, 2.2M  
518 formaldehyde, 1X MOPS) followed by ice incubation for 5 min. 10X Dye buffer (50% Glycerol,  
519 0.3% Bromophenol Blue, 4mg/ml Ethidium Bromide) was added to each sample and all of them were  
520 run on a formaldehyde agarose gel (0.8% agarose, 1X MOPS, 6.5% formaldehyde) at 5V per cm in  
521 1X MOPS buffer (0.2M MOPS, 50mM NaOAc, 10 mM EDTA, RNase free water). The gel was  
522 rinsed twice in water, washed twice with denaturation solution (1.5M NaCl, 0.05M NaOH), followed  
523 by additional three washes with 20XSSC before transferring the RNA on a positively charged  
524 Biodyne B nylon membrane (Amersham Hybond, GE Healthcare) using a neutral transfer in 20XSSC.  
525 The membrane was fixed and detected as described for the RNA dot blot.

### 526 **Supplementary Tables**

#### 527 **Table S1. List of antibodies used for ChIP**

| Name   | Species | Reference              |
|--------|---------|------------------------|
| IgG    | Rabbit  | Abcam, ab37415         |
| TRF2   | Rabbit  | Novus, NB110-57130/ B2 |
| BRCA1  | Rabbit  | Novus, NBP1-45410      |
| BAZ1b  | Rabbit  | Cell Signaling, 2152S  |
| TR4    | Mouse   | pp-H0107B-00           |
| P66a   | Rabbit  | Novus, NBP1-87359      |
| MTA1   | Rabbit  | Abcam, ab71153         |
| CHD4   | Rabbit  | Novus, NB100-57521     |
| ZNF827 | Mouse   | Santa Cruz, sc514943   |

528

529 And for IF, WB:

| Name       | Species | Reference                        |
|------------|---------|----------------------------------|
| IgG        | Rabbit  | Abcam, ab37415                   |
| TRF2       | Rabbit  | Novus, NB110-57130/ B2           |
| TRF2       | Rabbit  | Gift from T. de Lange. Ref: 1254 |
| TRF1       | Rabbit  | Gift from T. de Lange. Ref: 1449 |
| PML        | Rabbit  | Gift from Paul Freemont          |
| SMC5       | Rabbit  | Gift from Jo Murray              |
| Beta-actin | Mouse   | Abcam, ab8226                    |
| BrdU       | Mouse   | MBL, MI-11-3                     |

|                                |        |                |
|--------------------------------|--------|----------------|
| Anti-rabbit Alexa 488 antibody | Donkey | Thermo, A21206 |
| Anti-mouse Ig-HRP              | Goat   | DAKO, P0447    |
| Anti-Rabbit Ig-HRP             | Pig    | DAKO, P0217    |

530

531

532

### 533 **Acknowledgements**

534 We thank Titia de Lange for providing TRF1 antibody, Paul Freemont for providing PML antibody  
535 and Jo Murray for SMC5 antibody. Special thanks to Paulina Marzec for teaching R.M.P the PICh  
536 techniques in Boulton Lab. We thank Arturo Londono, Julia P. Cooper, Julian Sale, Titia de Lange,  
537 Valerie Borel, Simon Boulton for their helpful comments. TRF1 MEFs were generated in Simon  
538 Boulton's group from Titia de Lange's mouse line and Clare H. McGowan's group, respectively.  
539 Vannier lab work is supported by the London Institute of Medical Sciences (LMS), which receives  
540 its core funding from UKRI (previously MRC) and by an ERC Starter Grant (637798;  
541 MetDNASecStr).

542

### 543 **Author contributions**

544 R.M.P and J.B.V designed the project and wrote the manuscript. R.M.P, P.P.L, E.H.M, R.G.F and  
545 J.B.V conducted experiments. A.M, P.F, H.K performed mass spectrometry analysis.

546

### 547 **Data availability statement**

548 All relevant data are available from the authors. The source data underlying Figs 1B, 1D, 1F, 2B-2D,  
549 S2, 3A-C, 4C, 4D, 4F, 5A-C, 5E, 6A-C and supplementary Figs S1A-S1B, S3B-S3D, S4A-S4C,

550 S5A,-S5C and S6D are provided as a Source data file. Accession code for the proteomic data will be  
551 made available before publication on public repository PRIDE.

552

### 553 **Competing interests' statement**

554 The authors declare no conflict of interests.

555

556

### 557 **References**

- 558 Amon, J. D., & Koshland, D. (2016). RNase H enables efficient repair of R-loop induced DNA  
559 damage. *Elife*, 5. doi:10.7554/eLife.20533
- 560 Aragon, L. (2018). The Smc5/6 Complex: New and Old Functions of the Enigmatic Long-  
561 Distance Relative. *Annu Rev Genet*, 52, 89-107. doi:10.1146/annurev-genet-120417-  
562 031353
- 563 Arora, R., Lee, Y., Wischniewski, H., Brun, C. M., Schwarz, T., & Azzalin, C. M. (2014). RNaseH1  
564 regulates TERRA-telomeric DNA hybrids and telomere maintenance in ALT tumour  
565 cells. *Nat Commun*, 5, 5220. doi:10.1038/ncomms6220
- 566 Azzalin, C. M., Reichenbach, P., Khoraiuli, L., Giulotto, E., & Lingner, J. (2007). Telomeric repeat-  
567 containing RNA and RNA surveillance factors at mammalian chromosome ends. *Science*,  
568 318(5851), 798-801. doi:10.1126/science.1147182
- 569 Barefield, C., & Karlseder, J. (2012). The BLM helicase contributes to telomere maintenance  
570 through processing of late-replicating intermediate structures. *Nucleic Acids Res*, 40(15),  
571 7358-7367. doi:10.1093/nar/gks407
- 572 Bhowmick, R., Minocherhomji, S., & Hickson, I. D. (2016). RAD52 Facilitates Mitotic DNA  
573 Synthesis Following Replication Stress. *Molecular Cell*, 64(6), 1117-1126.  
574 doi:10.1016/j.molcel.2016.10.037
- 575 Bryan, T. M., Englezou, A., Dalla-Pozza, L., Dunham, M. A., & Reddel, R. R. (1997). Evidence for  
576 an alternative mechanism for maintaining telomere length in human tumors and tumor-  
577 derived cell lines. *Nat Med*, 3(11), 1271-1274.
- 578 Cesare, A. J., Kaul, Z., Cohen, S. B., Napier, C. E., Pickett, H. A., Neumann, A. A., & Reddel, R. R.  
579 (2009). Spontaneous occurrence of telomeric DNA damage response in the absence of  
580 chromosome fusions. *Nat Struct Mol Biol*, 16(12), 1244-1251. doi:10.1038/nsmb.1725
- 581 Cesare, A. J., & Reddel, R. R. (2010). Alternative lengthening of telomeres: models, mechanisms  
582 and implications. *Nat Rev Genet*, 11(5), 319-330. doi:10.1038/nrg2763
- 583 Chen, Y. H., Choi, K., Szakal, B., Arenz, J., Duan, X., Ye, H., . . . Zhao, X. (2009). Interplay between  
584 the Smc5/6 complex and the Mph1 helicase in recombinational repair. *Proc Natl Acad  
585 Sci U S A*, 106(50), 21252-21257. doi:10.1073/pnas.0908258106
- 586 Conomos, D., Pickett, H. A., & Reddel, R. R. (2013). Alternative lengthening of telomeres:  
587 remodeling the telomere architecture. *Front Oncol*, 3, 27. doi:10.3389/fonc.2013.00027
- 588 Conomos, D., Reddel, R. R., & Pickett, H. A. (2014). NuRD-ZNF827 recruitment to telomeres  
589 creates a molecular scaffold for homologous recombination. *Nat Struct Mol Biol*, 21(9),  
590 760-770. doi:10.1038/nsmb.2877



- 591 Conomos, D., Stutz, M. D., Hills, M., Neumann, A. A., Bryan, T. M., Reddel, R. R., & Pickett, H. A.  
592 (2012). Variant repeats are interspersed throughout the telomeres and recruit nuclear  
593 receptors in ALT cells. *J Cell Biol*, *199*(6), 893-906. doi:10.1083/jcb.201207189
- 594 Cox, J., Hein, M. Y., Lubner, C. A., Paron, I., Nagaraj, N., & Mann, M. (2014). Accurate proteome-  
595 wide label-free quantification by delayed normalization and maximal peptide ratio  
596 extraction, termed MaxLFQ. *Mol Cell Proteomics*, *13*(9), 2513-2526.  
597 doi:10.1074/mcp.M113.031591
- 598 Cox, K. E., Marechal, A., & Flynn, R. L. (2016). SMARCAL1 Resolves Replication Stress at ALT  
599 Telomeres. *Cell Rep*, *14*(5), 1032-1040. doi:10.1016/j.celrep.2016.01.011
- 600 d'Alcontres, M. S., Palacios, J. A., Mejias, D., & Blasco, M. A. (2014). TopoIIalpha prevents  
601 telomere fragility and formation of ultra thin DNA bridges during mitosis through TRF1-  
602 dependent binding to telomeres. *Cell Cycle*, *13*(9), 1463-1481. doi:10.4161/cc.28419
- 603 de Lange, T. (2005). Shelterin: the protein complex that shapes and safeguards human  
604 telomeres. *Genes Dev*, *19*(18), 2100-2110. doi:10.1101/gad.1346005
- 605 Dejardin, J., & Kingston, R. E. (2009). Purification of proteins associated with specific genomic  
606 Loci. *Cell*, *136*(1), 175-186. doi:10.1016/j.cell.2008.11.045
- 607 Deng, Z., Norseen, J., Wiedmer, A., Riethman, H., & Lieberman, P. M. (2009). TERRA RNA binding  
608 to TRF2 facilitates heterochromatin formation and ORC recruitment at telomeres.  
609 *Molecular Cell*, *35*(4), 403-413. doi:10.1016/j.molcel.2009.06.025
- 610 Dilley, R. L., Verma, P., Cho, N. W., Winters, H. D., Wondisford, A. R., & Greenberg, R. A. (2016).  
611 Break-induced telomere synthesis underlies alternative telomere maintenance. *Nature*,  
612 *539*(7627), 54-58. doi:10.1038/nature20099
- 613 Draskovic, I., Arnoult, N., Steiner, V., Bacchetti, S., Lomonte, P., & Londono-Vallejo, A. (2009).  
614 Probing PML body function in ALT cells reveals spatiotemporal requirements for  
615 telomere recombination. *Proc Natl Acad Sci U S A*, *106*(37), 15726-15731.  
616 doi:10.1073/pnas.0907689106
- 617 Garcia-Exposito, L., Bournique, E., Bergoglio, V., Bose, A., Barroso-Gonzalez, J., Zhang, S., . . .  
618 O'Sullivan, R. J. (2016). Proteomic Profiling Reveals a Specific Role for Translesion DNA  
619 Polymerase eta in the Alternative Lengthening of Telomeres. *Cell Rep*, *17*(7), 1858-1871.  
620 doi:10.1016/j.celrep.2016.10.048
- 621 Glover, T. W., & Stein, C. K. (1987). Induction of sister chromatid exchanges at common fragile  
622 sites. *Am J Hum Genet*, *41*(5), 882-890.
- 623 Gu, P., Min, J. N., Wang, Y., Huang, C., Peng, T., Chai, W., & Chang, S. (2012). CTC1 deletion results  
624 in defective telomere replication, leading to catastrophic telomere loss and stem cell  
625 exhaustion. *EMBO J*, *31*(10), 2309-2321. doi:10.1038/emboj.2012.96
- 626 Ira, G., & Haber, J. E. (2002). Characterization of RAD51-independent break-induced replication  
627 that acts preferentially with short homologous sequences. *Mol Cell Biol*, *22*(18), 6384-  
628 6392.
- 629 Khurana, S., Kruhlak, M. J., Kim, J., Tran, A. D., Liu, J., Nyswaner, K., . . . Oberdoerffer, P. (2014). A  
630 macrohistone variant links dynamic chromatin compaction to BRCA1-dependent  
631 genome maintenance. *Cell Rep*, *8*(4), 1049-1062. doi:10.1016/j.celrep.2014.07.024
- 632 Kim, N. W., Piatyszek, M. A., Prowse, K. R., Harley, C. B., West, M. D., Ho, P. L., . . . Shay, J. W. (1994).  
633 Specific association of human telomerase activity with immortal cells and cancer.  
634 *Science*, *266*(5193), 2011-2015.
- 635 Lafuente-Barquero, J., Luke-Glaser, S., Graf, M., Silva, S., Gomez-Gonzalez, B., Lockhart, A., . . .  
636 Luke, B. (2017). The Smc5/6 complex regulates the yeast Mph1 helicase at RNA-DNA  
637 hybrid-mediated DNA damage. *PLoS Genet*, *13*(12), e1007136.  
638 doi:10.1371/journal.pgen.1007136

- 639 Lee, Y. W., Arora, R., Wischniewski, H., & Azzalin, C. M. (2018). TRF1 participates in chromosome  
640 end protection by averting TRF2-dependent telomeric R loops. *Nat Struct Mol Biol*,  
641 25(2), 147-153. doi:10.1038/s41594-017-0021-5
- 642 Margalef, P., Kotsantis, P., Borel, V., Bellelli, R., Panier, S., & Boulton, S. J. (2018). Stabilization of  
643 Reversed Replication Forks by Telomerase Drives Telomere Catastrophe. *Cell*, 172(3),  
644 439-453 e414. doi:10.1016/j.cell.2017.11.047
- 645 Martinez, P., Thanasoula, M., Munoz, P., Liao, C., Tejera, A., McNees, C., . . . Blasco, M. A. (2009).  
646 Increased telomere fragility and fusions resulting from TRF1 deficiency lead to  
647 degenerative pathologies and increased cancer in mice. *Genes Dev*, 23(17), 2060-2075.  
648 doi:10.1101/gad.543509
- 649 Marzec, P., Armenise, C., Perot, G., Roumelioti, F. M., Basyuk, E., Gagos, S., . . . Dejardin, J. (2015).  
650 Nuclear-receptor-mediated telomere insertion leads to genome instability in ALT  
651 cancers. *Cell*, 160(5), 913-927. doi:10.1016/j.cell.2015.01.044
- 652 McNees, C. J., Tejera, A. M., Martinez, P., Murga, M., Mulero, F., Fernandez-Capetillo, O., & Blasco,  
653 M. A. (2010). ATR suppresses telomere fragility and recombination but is dispensable  
654 for elongation of short telomeres by telomerase. *J Cell Biol*, 188(5), 639-652.  
655 doi:10.1083/jcb.200908136
- 656 Miller, K. M., Rog, O., & Cooper, J. P. (2006). Semi-conservative DNA replication through  
657 telomeres requires Taz1. *Nature*, 440(7085), 824-828. doi:10.1038/nature04638
- 658 Min, J., Wright, W. E., & Shay, J. W. (2017). Alternative Lengthening of Telomeres Mediated by  
659 Mitotic DNA Synthesis Engages Break-Induced Replication Processes. *Mol Cell Biol*,  
660 37(20). doi:10.1128/MCB.00226-17
- 661 Minocherhomji, S., & Hickson, I. D. (2014). Structure-specific endonucleases: guardians of  
662 fragile site stability. *Trends Cell Biol*, 24(5), 321-327. doi:10.1016/j.tcb.2013.11.007
- 663 Minocherhomji, S., Ying, S., Bjerregaard, V. A., Bursomanno, S., Aleliunaite, A., Wu, W., . . .  
664 Hickson, I. D. (2015). Replication stress activates DNA repair synthesis in mitosis.  
665 *Nature*, 528(7581), 286-290. doi:10.1038/nature16139
- 666 Moyzis, R. K., Buckingham, J. M., Cram, L. S., Dani, M., Deaven, L. L., Jones, M. D., . . . Wu, J. R.  
667 (1988). A highly conserved repetitive DNA sequence, (TTAGGG)<sub>n</sub>, present at the  
668 telomeres of human chromosomes. *Proc Natl Acad Sci U S A*, 85(18), 6622-6626.
- 669 Nakamura, H., Morita, T., & Sato, C. (1986). Structural organizations of replicon domains during  
670 DNA synthetic phase in the mammalian nucleus. *Experimental Cell Research*, 165(2),  
671 291-297.
- 672 Neil, A. J., Liang, M. U., Khristich, A. N., Shah, K. A., & Mirkin, S. M. (2018). RNA-DNA hybrids  
673 promote the expansion of Friedreich's ataxia (GAA)<sub>n</sub> repeats via break-induced  
674 replication. *Nucleic Acids Res*, 46(7), 3487-3497. doi:10.1093/nar/gky099
- 675 Ourliac-Garnier, I., & Londono-Vallejo, A. (2011). Telomere length analysis by quantitative  
676 fluorescent in situ hybridization (Q-FISH). *Methods Mol Biol*, 735, 21-31.  
677 doi:10.1007/978-1-61779-092-8\_3
- 678 Palm, W., & de Lange, T. (2008). How shelterin protects mammalian telomeres. *Annu Rev Genet*,  
679 42, 301-334. doi:10.1146/annurev.genet.41.110306.130350
- 680 Pan, X., Drosopoulos, W. C., Sethi, L., Madireddy, A., Schildkraut, C. L., & Zhang, D. (2017).  
681 FANCM, BRCA1, and BLM cooperatively resolve the replication stress at the ALT  
682 telomeres. *Proc Natl Acad Sci U S A*, 114(29), E5940-E5949.  
683 doi:10.1073/pnas.1708065114
- 684 Porreca, R. M., Glousker, G., Awad, A., Matilla Fernandez, M. I., Gibaud, A., Naucke, C., . . . Londono-  
685 Vallejo, A. (2018). Human RTEL1 stabilizes long G-overhangs allowing telomerase-  
686 dependent over-extension. *Nucleic Acids Res*, 46(9), 4533-4545.  
687 doi:10.1093/nar/gky173

- 688 Potts, P. R., Porteus, M. H., & Yu, H. (2006). Human SMC5/6 complex promotes sister chromatid  
689 homologous recombination by recruiting the SMC1/3 cohesin complex to double-strand  
690 breaks. *EMBO J*, *25*(14), 3377-3388. doi:10.1038/sj.emboj.7601218
- 691 Potts, P. R., & Yu, H. (2007). The SMC5/6 complex maintains telomere length in ALT cancer cells  
692 through SUMOylation of telomere-binding proteins. *Nat Struct Mol Biol*, *14*(7), 581-590.  
693 doi:10.1038/nsmb1259
- 694 Roumelioti, F. M., Sotiriou, S. K., Katsini, V., Chiourea, M., Halazonetis, T. D., & Gagos, S. (2016).  
695 Alternative lengthening of human telomeres is a conservative DNA replication process  
696 with features of break-induced replication. *EMBO Rep*, *17*(12), 1731-1737.  
697 doi:10.15252/embr.201643169
- 698 Schoeftner, S., & Blasco, M. A. (2008). Developmentally regulated transcription of mammalian  
699 telomeres by DNA-dependent RNA polymerase II. *Nat Cell Biol*, *10*(2), 228-236.  
700 doi:10.1038/ncb1685
- 701 Sfeir, A., Kosiyatrakul, S. T., Hockemeyer, D., MacRae, S. L., Karlseder, J., Schildkraut, C. L., & de  
702 Lange, T. (2009). Mammalian telomeres resemble fragile sites and require TRF1 for  
703 efficient replication. *Cell*, *138*(1), 90-103. doi:10.1016/j.cell.2009.06.021
- 704 Shevchenko, A., Tomas, H., Havlis, J., Olsen, J. V., & Mann, M. (2006). In-gel digestion for mass  
705 spectrometric characterization of proteins and proteomes. *Nat Protoc*, *1*(6), 2856-2860.  
706 doi:10.1038/nprot.2006.468
- 707 Sotiriou, S. K., Kamileri, I., Lugli, N., Evangelou, K., Da-Re, C., Huber, F., . . . Halazonetis, T. D.  
708 (2016). Mammalian RAD52 Functions in Break-Induced Replication Repair of Collapsed  
709 DNA Replication Forks. *Molecular Cell*, *64*(6), 1127-1134.  
710 doi:10.1016/j.molcel.2016.10.038
- 711 Tong, A. S., Stern, J. L., Sfeir, A., Kartawinata, M., de Lange, T., Zhu, X. D., & Bryan, T. M. (2015).  
712 ATM and ATR Signaling Regulate the Recruitment of Human Telomerase to Telomeres.  
713 *Cell Rep*, *13*(8), 1633-1646. doi:10.1016/j.celrep.2015.10.041
- 714 Tumini, E., Barroso, S., Calero, C. P., & Aguilera, A. (2016). Roles of human POLD1 and POLD3 in  
715 genome stability. *Sci Rep*, *6*, 38873. doi:10.1038/srep38873
- 716 Vannier, J. B., Pavicic-Kaltenbrunner, V., Petalcorin, M. I., Ding, H., & Boulton, S. J. (2012). RTEL1  
717 dismantles T loops and counteracts telomeric G4-DNA to maintain telomere integrity.  
718 *Cell*, *149*(4), 795-806. doi:10.1016/j.cell.2012.03.030
- 719 Wu, G., Lee, W. H., & Chen, P. L. (2000). NBS1 and TRF1 colocalize at promyelocytic leukemia  
720 bodies during late S/G2 phases in immortalized telomerase-negative cells. Implication  
721 of NBS1 in alternative lengthening of telomeres. *J Biol Chem*, *275*(39), 30618-30622.  
722 doi:10.1074/jbc.C000390200
- 723 Wu, P., Takai, H., & de Lange, T. (2012). Telomeric 3' overhangs derive from resection by Exo1  
724 and Apollo and fill-in by POT1b-associated CST. *Cell*, *150*(1), 39-52.  
725 doi:10.1016/j.cell.2012.05.026
- 726 Yeager, T. R., Neumann, A. A., Englezou, A., Huschtscha, L. I., Noble, J. R., & Reddel, R. R. (1999).  
727 Telomerase-negative immortalized human cells contain a novel type of promyelocytic  
728 leukemia (PML) body. *Cancer Res*, *59*(17), 4175-4179.
- 729 Zaaier, S., Shaikh, N., Nageshan, R. K., & Cooper, J. P. (2016). Rif1 Regulates the Fate of DNA  
730 Entanglements during Mitosis. *Cell Rep*, *16*(1), 148-160.  
731 doi:10.1016/j.celrep.2016.05.077
- 732 Zimmermann, M., Kibe, T., Kabir, S., & de Lange, T. (2014). TRF1 negotiates TTAGGG repeat-  
733 associated replication problems by recruiting the BLM helicase and the TPP1/POT1  
734 repressor of ATR signaling. *Genes Dev*, *28*(22), 2477-2491. doi:10.1101/gad.251611.114  
735

736 **Figure Legends**

737 **Figure 1. Proteomics of isolated chromatin segments (PICh) of TRF1 depleted mouse telomeres.**

738 **(A)** Overview of experimental timeline aimed at performing PICh experiment after induction of *TRF1*  
739 deletion. *TRF1<sup>F/F</sup>* MEFs were infected twice (day 0 and 3) with adenovirus containing either GFP-  
740 control or CRE and collected at day 7 for PICh experiments. **(B)** Western blot showing deletion of  
741 *TRF1* in MEFs after infections with CRE Adenovirus, at day 7 as in A. **(C)** Schematic representation  
742 of the PICh analysis performed to detect chromatin changes occurring at telomeres upon *TRF1*  
743 deletion. **(D)** Volcano Plot based on LFQ intensities of proteins. Cut off for differential expression  
744 were set to log<sub>2</sub> fold change (TRF1deletion/wt) > |2| and -Log (p-value) > 1. **(E)** Table listing shelterin  
745 components and some of the DNA damage response (DDR) factors identified. The corresponding  
746 number of unique peptide isolated is indicated for each factor of interest. Relative LFQ intensity  
747 abundance profiles were visualised in the form of a heat-map, by scaling each protein intensity to the  
748 maximum intensity across conditions. Light to darker colors indicate increasing relative protein  
749 abundance. **(F)** Connectivity map for proteins recruited at telomeres upon TRF1 deletion using string-  
750 db.org software. Solid lines, represents strong direct interactions, while dashed lines represent no  
751 evidence for direct interaction. In violet, DNA damage and repair proteins; in orange, factors  
752 belonging to DNA repair specifically involved in DNA recombination process; while in green and  
753 red, important factors for chromosome maintenance and factors involved in RNA metabolism,  
754 respectively. Source data are provided as a Source Data File.

755

756 **Figure 2. Recombination factors are recruited at TRF1 depleted telomeres.**

757 **(A)** Table listing chromatin remodelers identified. The corresponding number of unique peptide  
758 isolated is indicated for each factor of interest. Same as in Figure 1, light to darker colors indicate  
759 increasing relative protein abundance. **(B)** Validation of chromatin remodeler factors by ChIP-dot  
760 blot analysis in wt (+GFP) and *TRF1<sup>-/-</sup>* (+CRE) conditions using ChIP grade antibodies against

761 chosen factors after chromatin preparation from MEFs. The blot was revealed with a DIG-Tel-C-rich  
762 probe. CHIP signals were normalised to DNA input and GFP control. Data are represented as  
763 telomeric enrichment of proteins relative to GFP ( $n=3$ )  $\pm$  SEM. P values, two-tailed student t-test (\*,  
764  $P < 0.05$ ; \*\*,  $P < 0.01$ ; \*\*\*\*,  $P < 0.0001$ ). (C) Representative image of Immunofluorescence showing  
765 co-localisation of Telomeres (red) with PML (green) in MEFs nuclei (DAPI) treated with GFP and  
766 CRE. Data are represented as number of Telomeres-PML co-localising foci divided by the total  
767 number of PML present per nucleus ( $n=300$  nuclei) and are shown as mean (red line)  $\pm$  SEM. P  
768 values, two-tailed student t-test (\*\*\*\*,  $P < 0.0001$ ). Source data are provided as a Source Data File.  
769 (D) Representative images of the chromosome oriented CO-FISH assay with denaturation, used to  
770 score for telomeric T-SCEs in *TRF1*<sup>F/F</sup> MEFs infected with GFP or CRE. Telomeres are labeled with  
771 TelPNA-C-rich-Cy3 (red) and TellNA-G-rich-FAM (green), while chromosomes are counterstained  
772 with DAPI (blue). Scale bar, 10  $\mu$ m. Enlarged intersections show the difference between a  
773 chromosome with No T-SCE (top) and a chromosome with T-SCE (bottom). T-SCE images show  
774 double T-SCEs (left) and single chromatid events (right). Scale bar, 2  $\mu$ m. For quantification, T-SCE  
775 was considered positive when involved in a reciprocal exchange of telomere signal with its sister  
776 chromatid (both telomeres yellow) and for asymmetrical exchanges at single chromatid (one telomere  
777 yellow). Data are indicated as % of T-SCE per sister telomere. The mean values ( $n \geq 3000$   
778 chromosome ends)  $\pm$  SEM are indicated. P value, two-tailed student t-test (\*\*\*\*,  $P < 0.0001$ ).

779

### 780 **Figure 3. TRF1 depletion causes TERRAs upregulation.**

781 (A) RNA dot blot analysis in wt and *TRF1* deleted MEFs. The blot was revealed with a DIG-Tel-C-  
782 rich probe or 18s rRNA as a control. TERRA signals were normalised to 18s rRNA and GFP control  
783 ( $n = 3$ )  $\pm$  SEM. P values, two-tailed student t-test (\*\*\*\*,  $P < 0.0001$ ). (B) TERRA detection by  
784 Northern blotting upon *TRF1* deletion. The blot was revealed with a DIG-Tel-C-rich probe (upper  
785 part). Ethidium bromide (EtBr) staining (bottom) of rRNAs was used as loading control. TERRA

786 signals were normalized to 28s rRNA signal from EtBr staining ( $n = 2$ )  $\pm$  SEM. P values, two-tailed  
787 student t-test (\*\*,  $P < 0.01$ ). (C) Representative images of TERRA-FISH experiment (top panel)  
788 showing the difference between cells stained with TERRA (red), negative control with RNase A  
789 treatment and positive control after denaturation. TERRA-FISH quantification (bottom panel) in wt  
790 (+GFP) and *TRF1*<sup>-/-</sup> (+CRE) conditions. Graphs are representing the number of TERRA foci (left)  
791 and TERRA intensity (right) ( $n=250$ ). Red lines represent mean values, two-tailed student t-test  
792 (\*\*\*\*,  $P < 0.0001$ ); Mann-Whitney test used for TERRA intensity quantification (\*,  $P < 0.05$ ).

793

794 **Figure 4. Deletion of *TRF1* induces mitotic DNA synthesis at telomeres.**

795 (A) Schematic overview of the experimental timeline. *TRF1*<sup>F/F</sup> MEFs cells were infected twice (day  
796 0 and 3) with adenovirus containing either GFP control or CRE to mediate *TRF1* deletion. Prior to  
797 collection at day 7, cells were treated with either BrdU (100 $\mu$ M) for 2 hours or EdU (100 $\mu$ M) +  
798 colcemid for 1 hour, to perform respectively BrdU-Immunofluorescence (IF) or EdU-FISH on  
799 metaphases. (B) Representative image of BrdU (red) - TRF2 (green) immunofluorescence showing  
800 example of cells in S-phase (upper panel) and non-S-phase (bottom panel). (C) Immunofluorescence  
801 showing co-localisation of BrdU (red) with TRF2 (green) in *TRF1*<sup>F/F</sup> MEFs nuclei (DAPI, blue)  
802 treated with GFP and CRE. Scale bar, 5  $\mu$ m (denaturing conditions). Data are represented as % of  
803 cells in non-S-phase showing  $< 5$  or  $\geq 5$  BrdU-TRF2 co-localising foci ( $n=100$  nuclei). (D)  
804 Quantification of DNA synthesis using the number of EdU-positive intra-chromosomes or telomeres  
805 in *TRF1*<sup>F/F</sup> cells infected with GFP and CRE relative to the GFP control ( $n=50$  metaphases). Data are  
806 represented as relative enrichment to the GFP control  $\pm$  SEM. P values, two-tailed student t-test (\*\*,  
807  $P < 0.01$ ). (E) Schematic representation of Break Induced Replication (top part) with single EdU foci  
808 at a single chromatid and Homologous recombination (bottom part) with EdU foci at both chromatids.  
809 (F) Analysis of DNA synthesis in *TRF1* deleted cells. *Upper panel*: Non-telomeric mitotic DNA  
810 synthesis. Representative images showing EdU signal (green) in a single chromatid or in both

811 chromatids. Pie chart representing % of chromosomes having EdU signal at a single chromatid or at  
812 both chromatids. *Bottom panel:* Telomeric mitotic DNA synthesis. Representative images showing  
813 EdU signal (green) at telomeres (red) at single or both chromatids. Pie chart representing % of  
814 chromosomes having EdU signal at telomeres at a single chromatid or both chromatids. Source data  
815 are provided as a Source Data File.

816

817 **Figure 5. POLD3 but not SMC5 regulates mitotic DNA synthesis at *TRF1* deleted telomeres.**

818 **(A)** Western blotting showing expression of SMC5, TRF1 and Actin (loading control) proteins in  
819 *TRF1<sup>F/F</sup>* MEFs after infection with GFP or CRE-Adenovirus and deletion of *SMC5* by shRNA.  
820 shGAPDH is used as negative control. **(B)** Quantification of the knock-out and knock-down shown  
821 in A. Graph shows protein signal quantification relative to shGAPDH in +GFP control cells, data are  
822 represented as mean (n=3) ± SEM. **(C)** Quantification of *POLD3* mRNA levels relative to *GAPDH*  
823 control. Data are represented as mean (n=3) ± SEM. **(D)** Representative images of 6 different  
824 genotypes generated in the above description. Metaphases show EdU (green), telomeres labeled with  
825 TelpNA-C-rich-Cy3 (red) and chromosomes counterstained with DAPI (blue). Scale bar, 10 µm. **(E)**  
826 Quantification of mitotic DNA synthesis at telomeres (single chromatid) in *TRF1<sup>F/F</sup>* MEFs infected  
827 with shGAPDH control (GFP or CRE), shSMC5 (GFP or CRE) and shPOLD3 (GFP or CRE). Data  
828 are represented as number of EdU positive telomeres per metaphase ± SEM. n=50 metaphases. P  
829 value, two-tailed student t-test (\*\*,  $P < 0.01$ ; n.s.= non-significant). Source data are provided as a  
830 Source Data File.

831

832 **Figure 6. *SMC5* and *POLD3* are required for induction of recombination at *TRF1* deficient**  
833 **telomeres.**

834 **(A)** APBs formation in *TRF1* deleted cells is rescued in double mutants *TRF1-SMC5* and *TRF1-*  
835 *POLD3*. Quantification of APBs formation is represented as number of co-localising PML-telomere

836 foci divided by the total number of PML present per nucleus (n=300 nuclei analysed)  $\pm$  SEM. **(B)**  
837 Representative images of the chromosome oriented (CO)-FISH assay with denaturation, used to score  
838 for telomeric T-SCEs in *TRF1<sup>F/F</sup>* MEFs infected with shGAPHH control (GFP or CRE), shSMC5  
839 (GFP or CRE) and shPOLD3 (GFP or CRE). Telomeres are labeled with TelPNA-C-rich-Cy3 (red)  
840 and TellNA-G-rich-FAM (green), while chromosomes are counterstained with DAPI (blue). Scale  
841 bar, 10  $\mu$ m. For quantification T-SCE was considered positive when involved in a reciprocal  
842 exchange of telomere signal with its sister chromatid (both telomeres yellow) and for asymmetrical  
843 exchanges at single chromatid (one telomere yellow). Data are indicated as % of T-SCE per sister  
844 telomere (bottom panel). The mean values (n=>2600 chromosome ends)  $\pm$  SEM are indicated. P value,  
845 two-tailed student t-test (\*\*\*,  $P < 0.001$ ; \*\*\*\*,  $P < 0.0001$ ). **(C)** RNA dot blot analysis in *TRF1*,  
846 *SMC5*, *POLD3* single and double mutants. The blot was revealed with a DIG-Tel-C-rich probe or 18s  
847 rRNA as a control. TERRA signals were normalised to 18s rRNA and GFP control (bottom panel).  
848 Data are represented as relative TERRA signal (n = 4)  $\pm$  SEM. P values, two-tailed student t-test (\*,  
849  $P < 0.05$ ; \*\*\*,  $P < 0.001$ ; n.s.= non-significant). Source data are provided as a Source Data File.

850

851 **Figure 7. Model describing TRF1 as a negative regulator of telomeric transcription (TERRAs),**  
852 **APBs formation, telomeric recombination via Pold3-BIR dependent pathway.** Replicative stress  
853 induced by TRF1 deletion alters the chromatin status of these telomeres. Recruitment of chromatin  
854 remodelers/HR factors, TERRA accumulation and telomere fragility are observed. The SMC5/6  
855 complex and polymerase POLD3 are among the factors recruited at replicative-stressed telomeres,  
856 representing the key players for APBs formation and telomere recombination, particularly BIR-  
857 mechanism. We propose that increased TERRAs molecules at telomeres could lead to increased R-  
858 loops, which are bypassed by POLD3 dependent BIR to resolve fork progression hindrance.

859

860 **Supplemental Figure legends**



861 **Figure S1. ALU control for the validation of telomeric ChIP.**

862 (A) Control for Figure 2B, dot-blot for validation of chromatin remodelers factor specifically  
863 recruited at TRF1 depleted telomeres. The blot was revealed with a DIG-Alu probe. (B)  
864 Quantification of C. ChIP signals were normalised to DNA input and GFP control and data are  
865 represented as relative Alu enrichment (n=3)  $\pm$  SEM. Source data are provided as a Source Data File.  
866

867 **Figure S2. TRF1 suppresses different types of telomeric recombination.**

868 (A) Time course quantification of the different classes of T-SCEs using denaturing CO-FISH.  
869 *TRF1<sup>F/F</sup>* MEFs were collected 4 days and 7 days post-infection with CRE-adenovirus or GFP-  
870 (control). The different types of exchanges were classified into three different categories: all  
871 exchanges (single + double); double exchanges (reciprocal, both chromatids); single exchanges  
872 (asymmetrical, single chromatid). Graphs are representing as % of T-SCE per chromosome ends (n=  
873 at least 3000 events were scored)  $\pm$  SEM. P value, two-tailed student t-test (\*\*\*\*,  $P < 0.0001$ ; \*\*\*,  $P$   
874  $< 0.001$ ; n.s.= non-significant).

875

876 **Figure S3. TRF1 deletion causes increased TERRA levels also in primary MEFs (day 6) and**  
877 **immortalised MEFs at earlier time post-infection (day4).**

878 (A) Western blotting showing protein expression in wt and *TRF1* deficient primary MEFs (P4) 6 days  
879 post-infection with GFP- or CRE-Adenovirus (left panel) and in SV40-immortalised MEFs, 4 days  
880 post-infection (right panel). (B) RNA dot-blot analysis upon *TRF1* deletion showing increased  
881 TERRA signals in CRE-infected conditions compared to control GFP-. The blot was revealed with a  
882 DIG-Tel-C-rich probe or 18s rRNA as a control. (C) Quantification of B. Data are shown as TERRA  
883 signal relative to GFP condition (n=3)  $\pm$  SEM. P values, two-tailed student t-test (\*,  $P < 0.05$ ; \*\*\*\*,  
884  $P < 0.0001$ ) (D) TERRA detection by Northern blotting upon *TRF1* deletion showing increased High  
885 Molecular Weights (HMW) RNA molecules upon alkaline treatment (left blot). In native conditions,

886 HMW-TERRAs are not detected and no significant difference is observed for low molecular weight  
887 species (right blot). The blots were revealed with a DIG-Tel-C-rich probe (upper part). Ethidium  
888 bromide (EtBr) staining (bottom) of rRNAs was used as loading control. Source data are provided as  
889 a Source Data File.

890

891 **Figure S4. *TRF1* deficient MEFs do not present heterogeneous telomeres, neither c-circles.**

892 **(A)** Terminal Restriction Fragments (TRF) blot showing no telomere length heterogeneity upon *TRF1*  
893 deletion (+CRE, 7 days post-infection) compared to control *TRF1<sup>F/F</sup>* +GFP MEFs. The blot was  
894 revealed with a DIG-Tel-C-rich probe (right). Ethidium bromide (EtBr) staining (left) is used as  
895 loading control. **(B)** Quantification of telomerase activity levels by TRAP assay showing no changes  
896 in telomerase activity after *TRF1* deletion in MEFs. Values are normalised to the control HT1080-ST  
897 cells (100%) and are represented as mean (n=4)  $\pm$  SD. **(C)** C-circle assay showing no c-circle  
898 formation upon *TRF1* deletion (+CRE, 7 days post-infection) compared to control *TRF1<sup>F/F</sup>* +GFP  
899 MEFs. Phi polymerase amplification products were spotted on the membrane and revealed using  
900 DIG-TelC probe. *TRF1<sup>F/F</sup>* MEFs treated with aphidicolin (APH) are used as negative control for  
901 telomere fragility not inducing C-circles, while U2OS, ALT positive cell line, is used as positive  
902 control. Source data are provided as a Source Data File.

903

904 **Figure S5. (related to Figure 4). Cell proliferation and EdU incorporation are not affected in**  
905 ***TRF1*, *TRF1-SMC5* and *TRF1-POLD3* mutants.**

906 **(A)** Growth curves showing cell proliferation in *TRF1<sup>F/F</sup>* MEFs infected with shGAPDH control (GFP  
907 or CRE), shSMC5 (GFP or CRE) and shPOLD3 (GFP or CRE). Population doublings were calculated  
908 for each condition. **(B)** Representative images of IF showing EdU(green) incorporation in MEFs  
909 nuclei (DAPI). Quantification of cells (as %) incorporating EdU using IF-staining (n=250). Cells  
910 positive for EdU staining were classified as in S-Phase, while cells negatively stained for EdU were

911 scored as in non-S phase, for the same genetic backgrounds as in A. Source data are provided as a  
912 Source Data File.

913

914 **Figure S6. SMC5 and POLD3 are dispensable for TRF1 dependent telomere fragility but**  
915 **required for recombination events.**

916 **(A)** Representative images of metaphases stained with TelpNA-Cy3 probe (red) and DAPI (blue)  
917 from *TRF1<sup>F/F</sup>* MEFs infected with shGAPDH control (GFP or CRE), shSMC5 (GFP or CRE) and  
918 shPOLD3 (GFP or CRE). Scale bar, 10  $\mu$ m. **(B)** Enlarged image showing telomere fragility. **(C)**  
919 Quantification of A-B. Data are indicated as % telomere fragility per chromosome. The mean values  
920  $\pm$  SEM are indicated. P value, two-tailed student t-test (\*\*\*\*,  $P < 0.0001$ ). Source data are provided  
921 as a Source Data File.

922

923

924

925

926

927

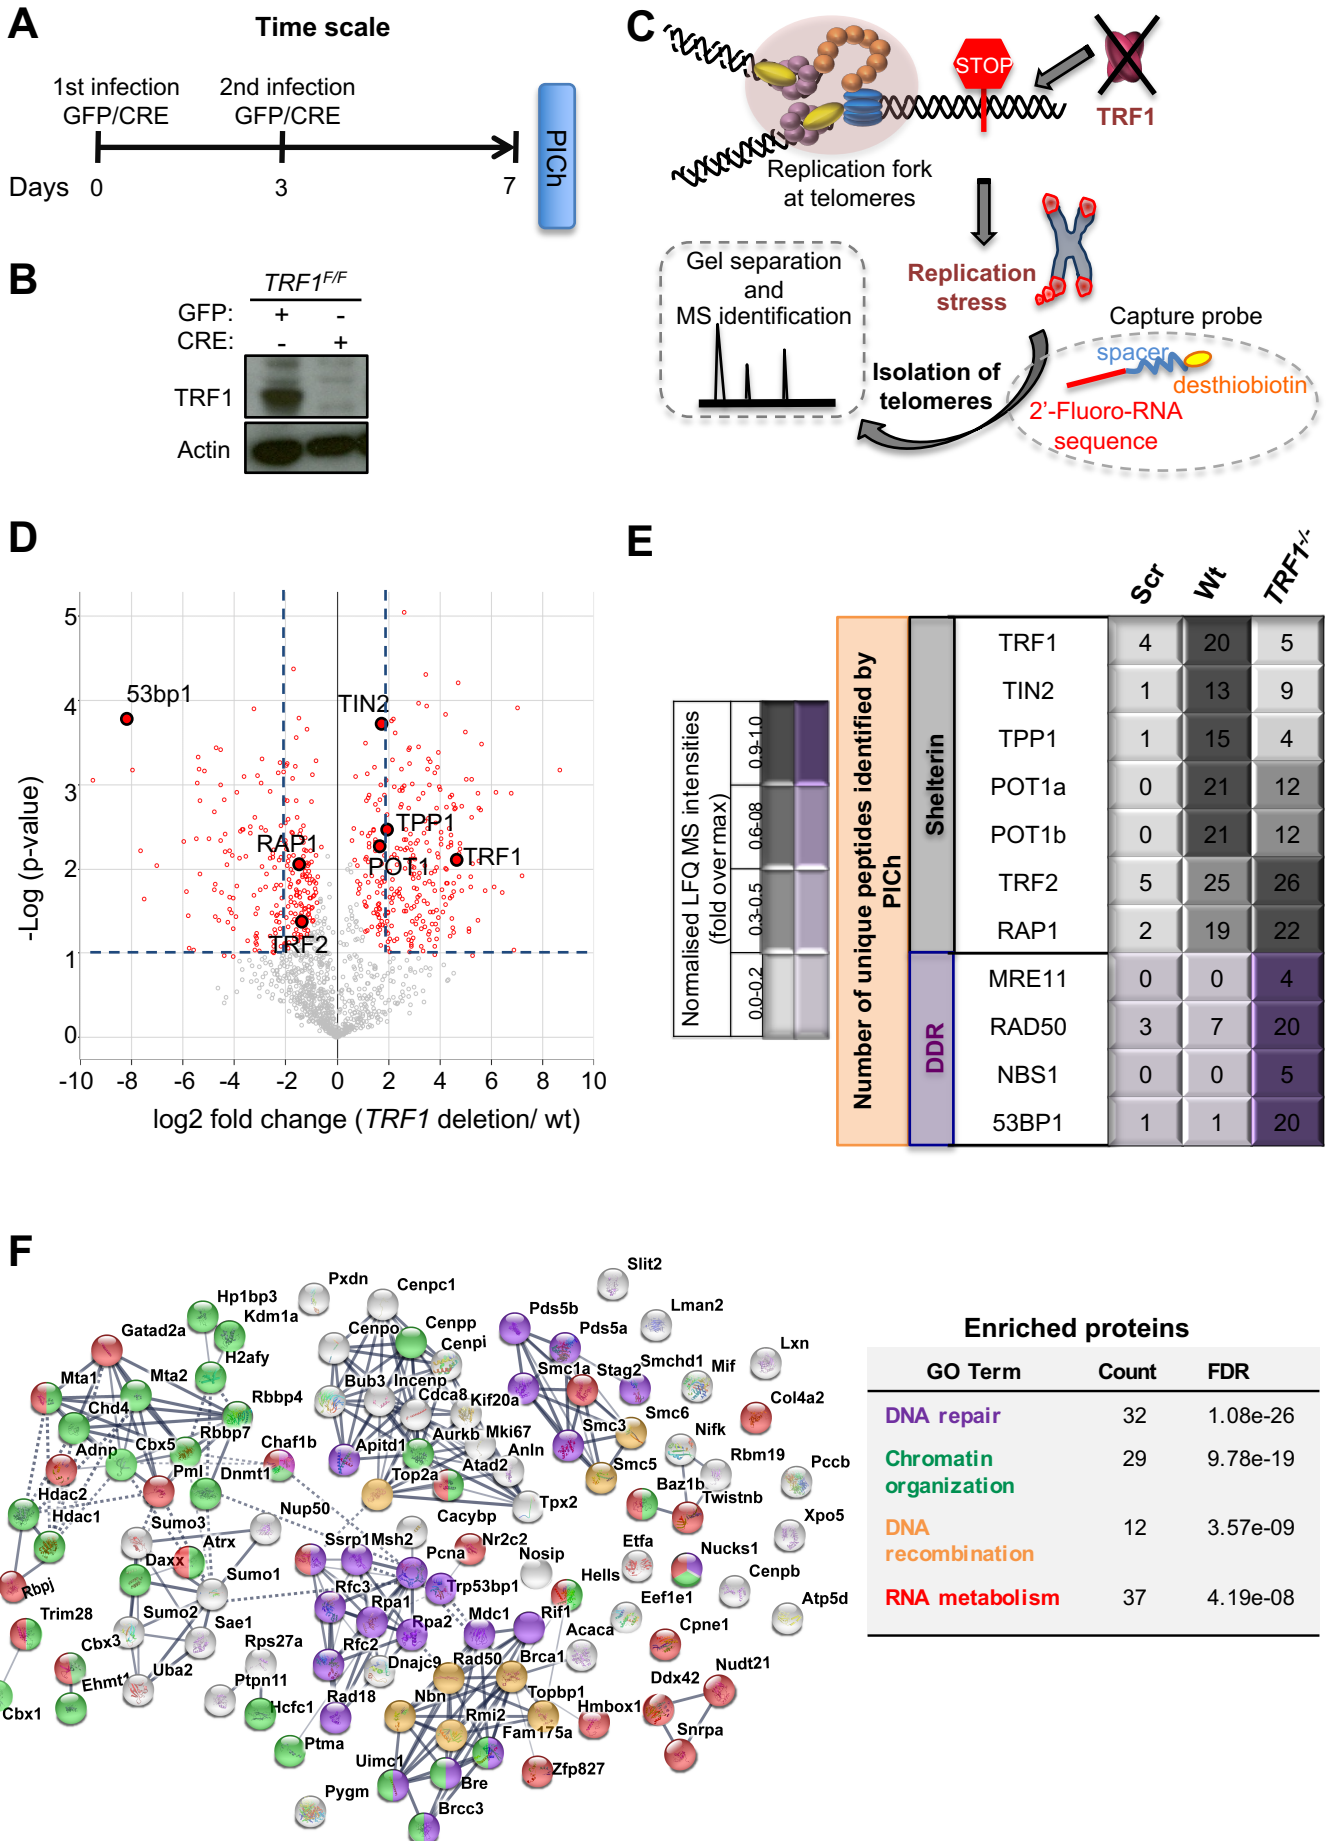

**A**

| Normalised LFQ MS intensities<br>(fold over max) |         |         |         |
|--------------------------------------------------|---------|---------|---------|
| 0.0-0.2                                          | 0.3-0.5 | 0.6-0.8 | 0.9-1.0 |
|                                                  |         |         |         |

| Number of unique peptides identified<br>by PICh | Chromatin remodellers |    | Scr   | Wt | TRF1 <sup>-/-</sup> |
|-------------------------------------------------|-----------------------|----|-------|----|---------------------|
|                                                 |                       |    | BAZ1b | 4  | 9                   |
| BRCA1                                           | 2                     | 1  | 10    |    |                     |
| PML                                             | 1                     | 1  | 9     |    |                     |
| SMC5                                            | 2                     | 4  | 16    |    |                     |
| SMC6                                            | 0                     | 1  | 12    |    |                     |
| ATRX                                            | 0                     | 23 | 33    |    |                     |
| p66a                                            | 0                     | 1  | 5     |    |                     |
| MTA1                                            | 0                     | 2  | 7     |    |                     |
| CHD4                                            | 3                     | 12 | 25    |    |                     |
| ZNF827                                          | 2                     | 12 | 20    |    |                     |

**B**

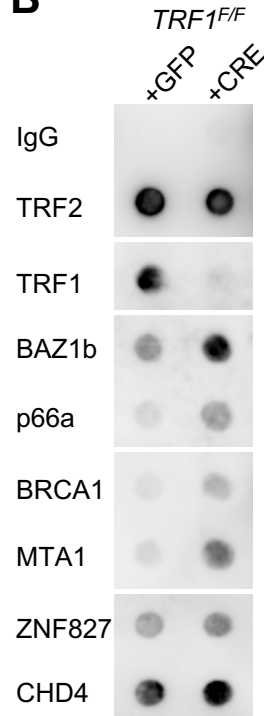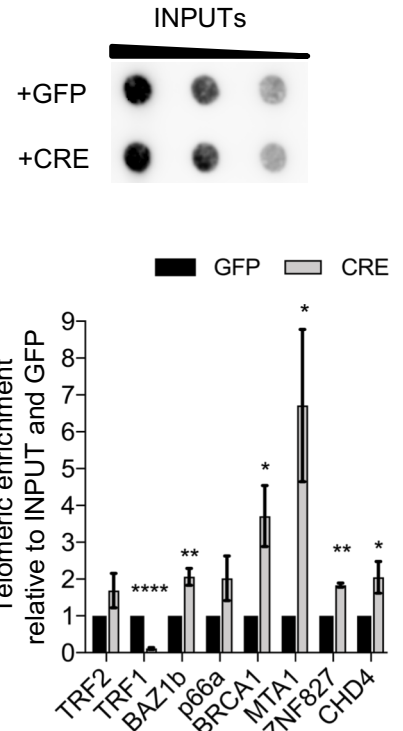

**C**

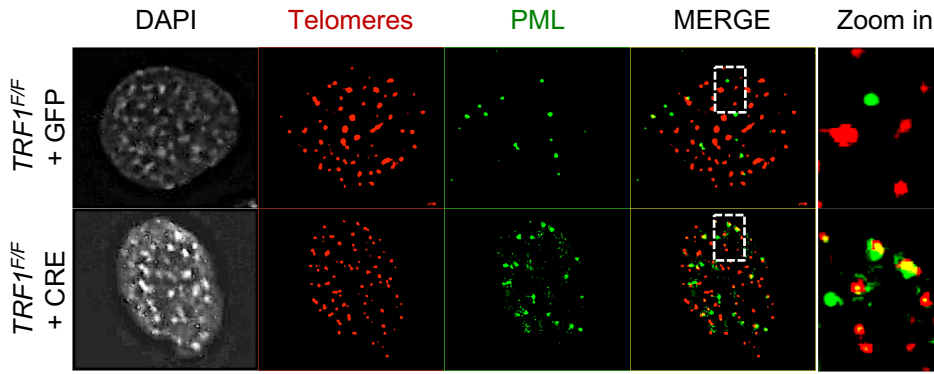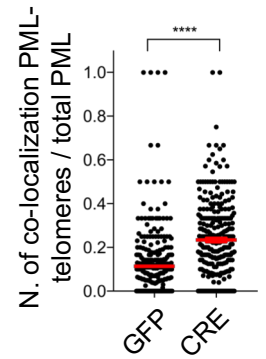

**D**

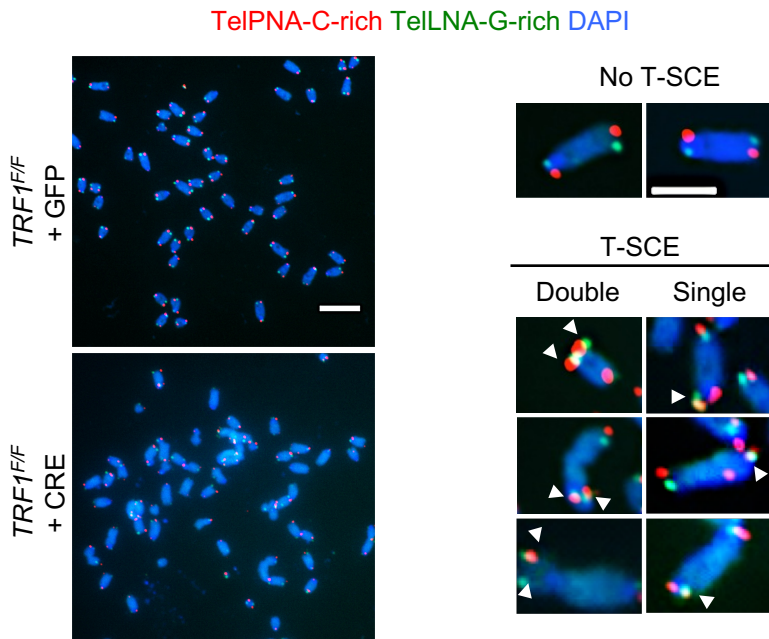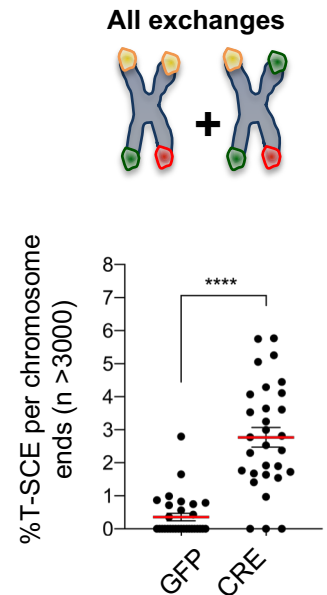

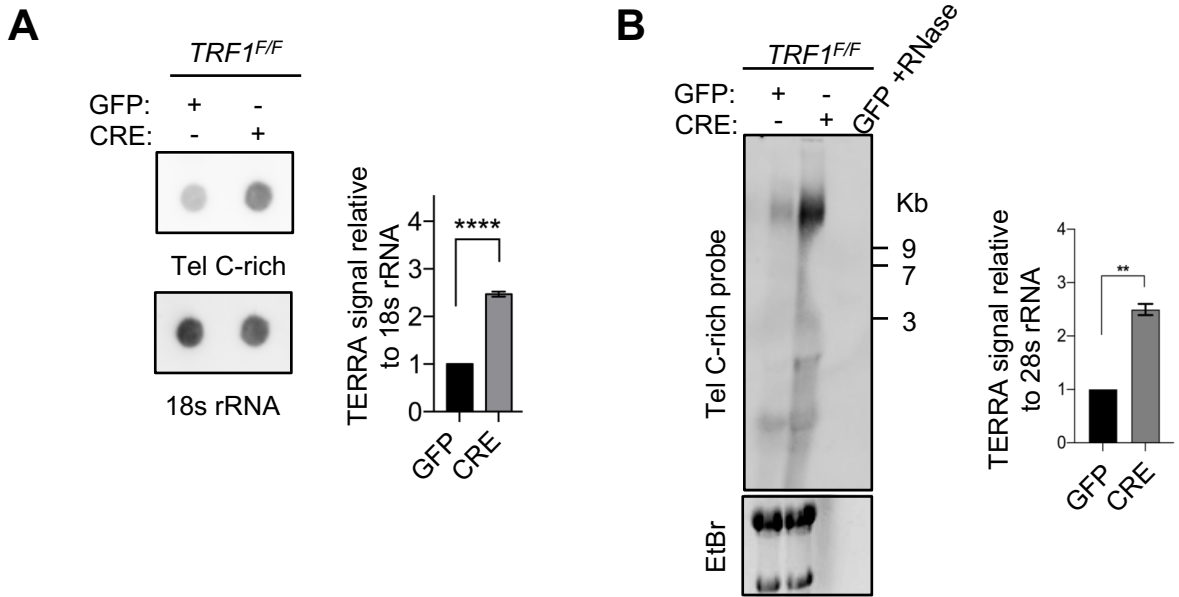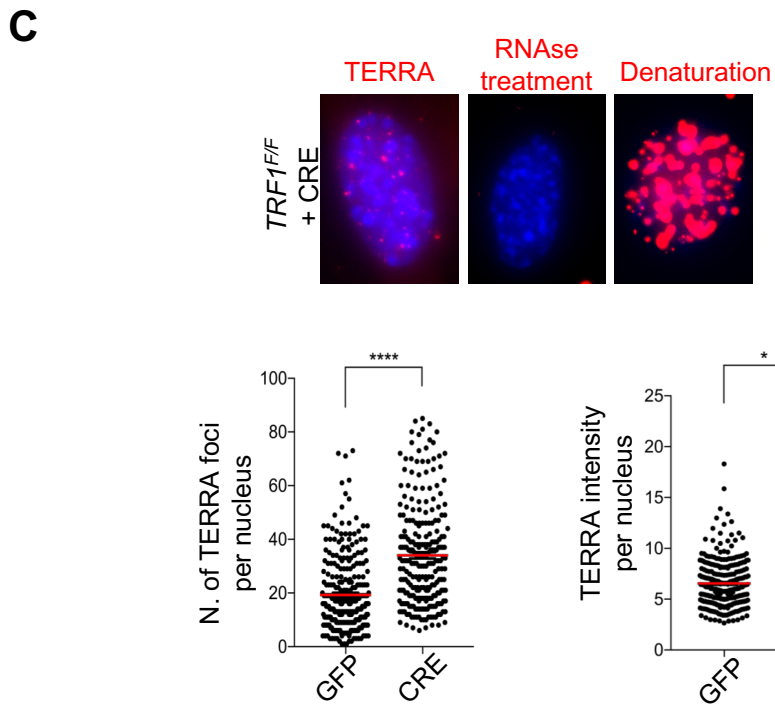

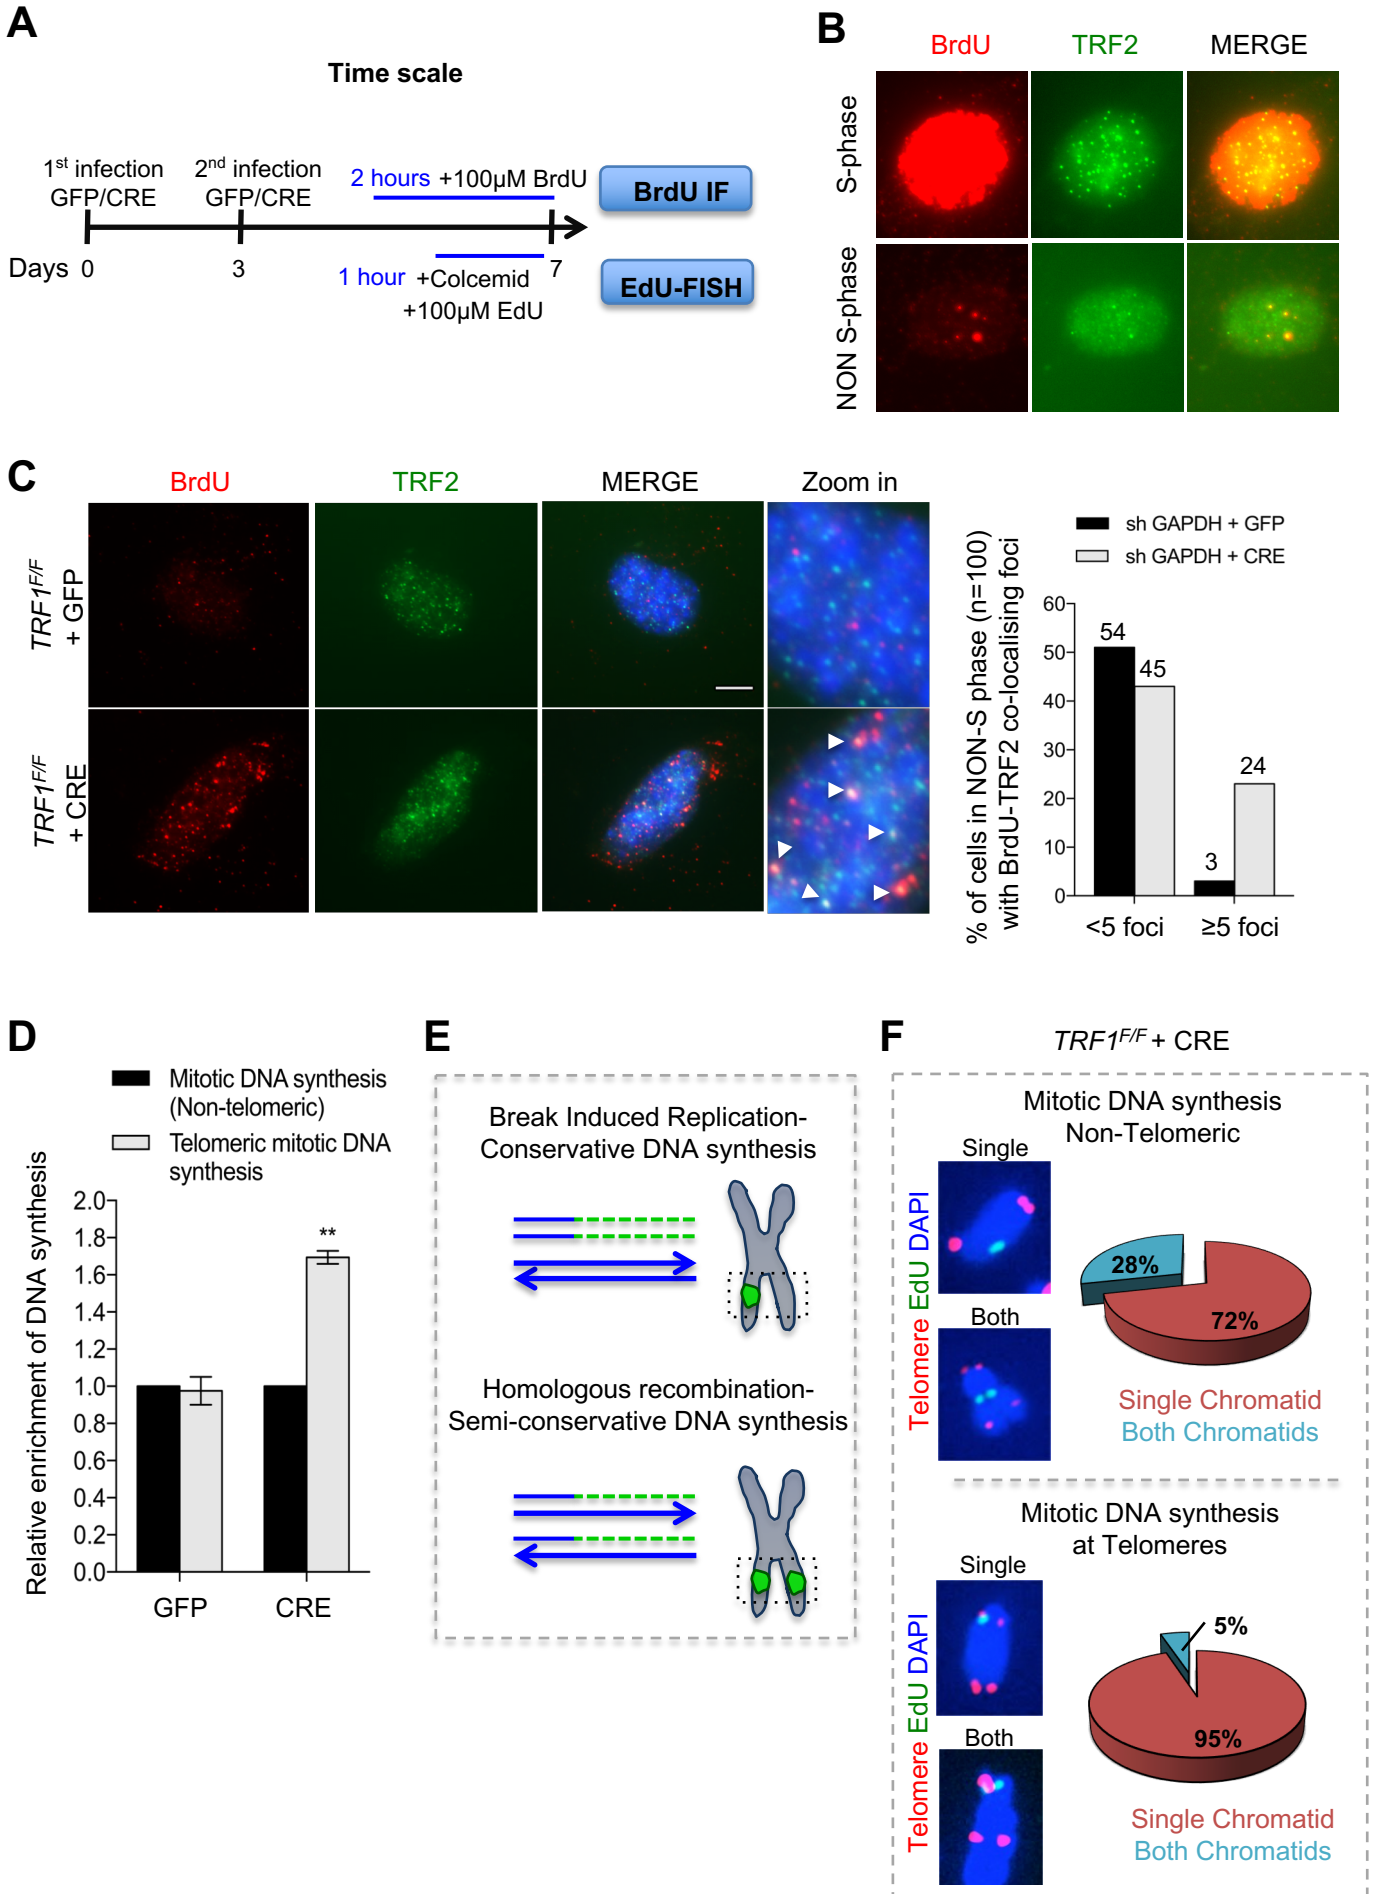

**A**

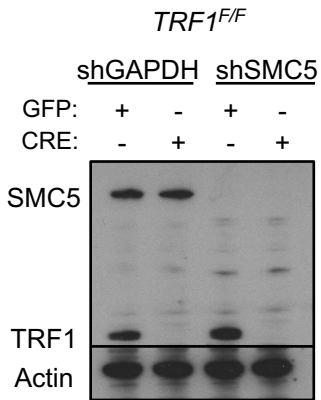

**B**

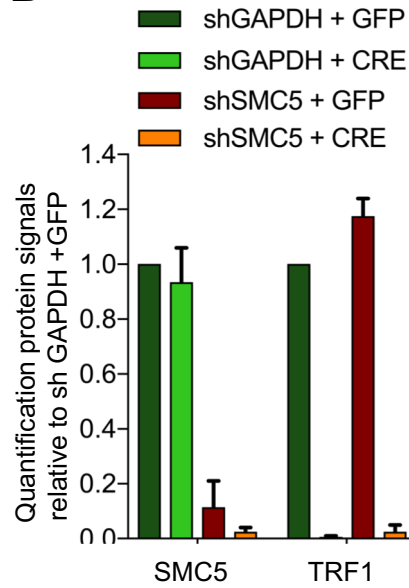

**C**

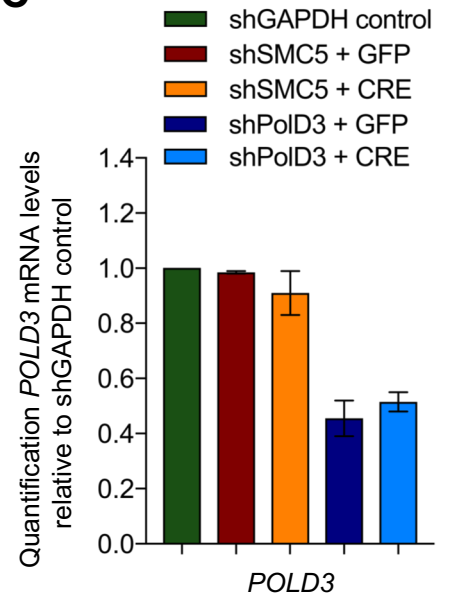

**D**

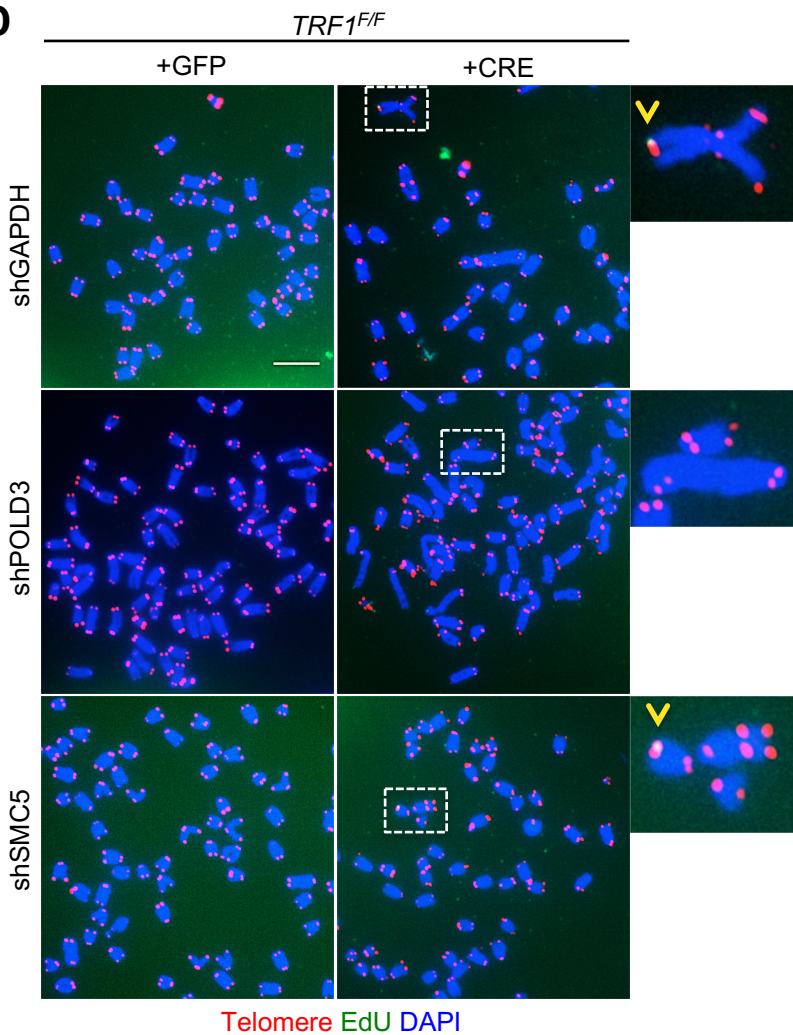

**E**

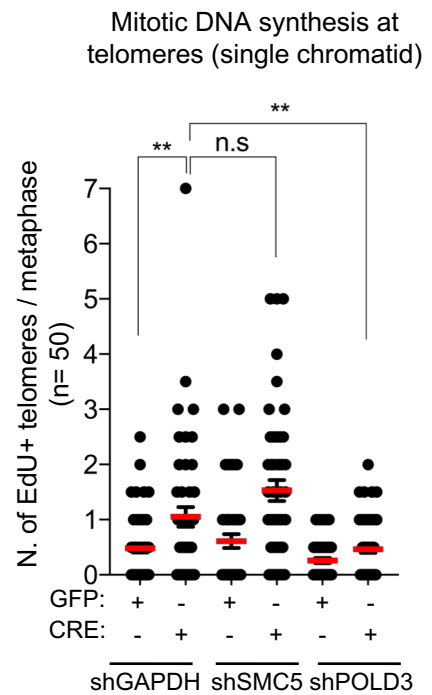



**A**

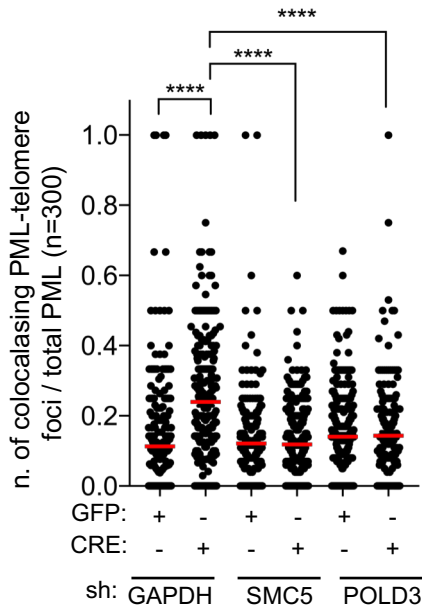

**B**

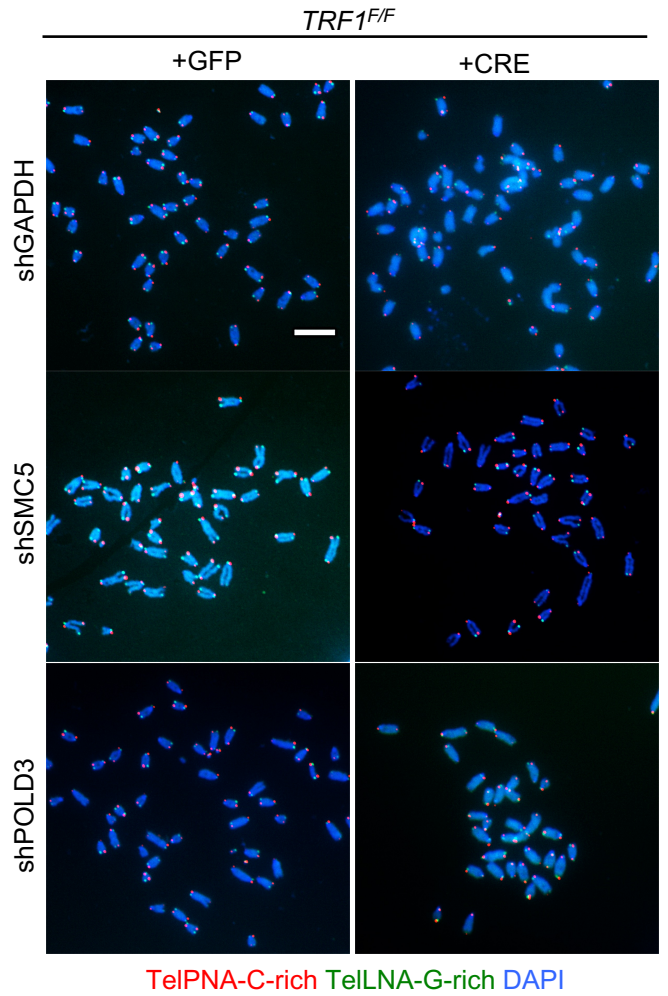

**C**

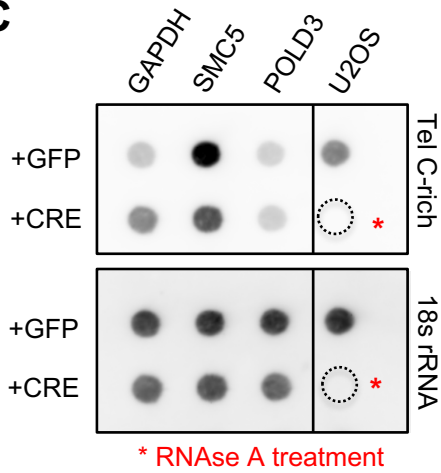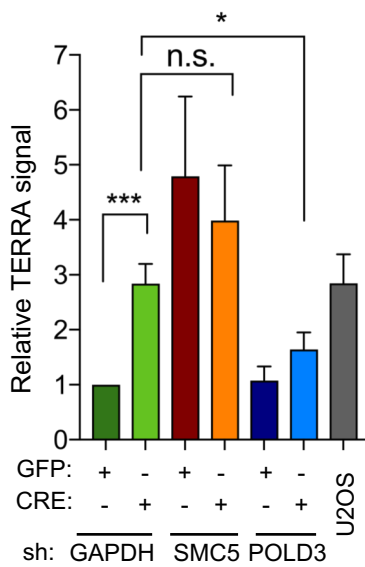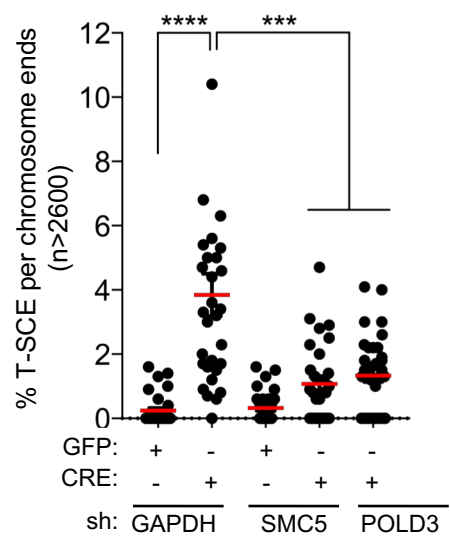

A

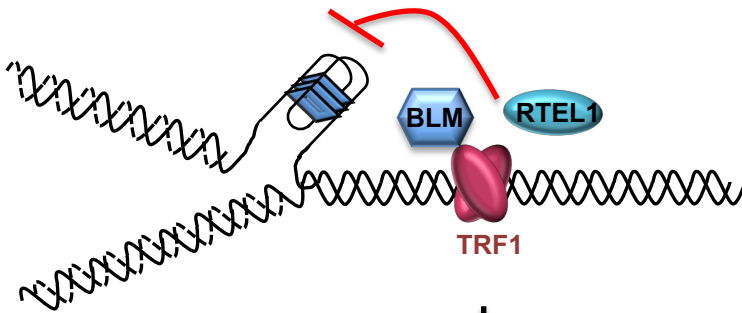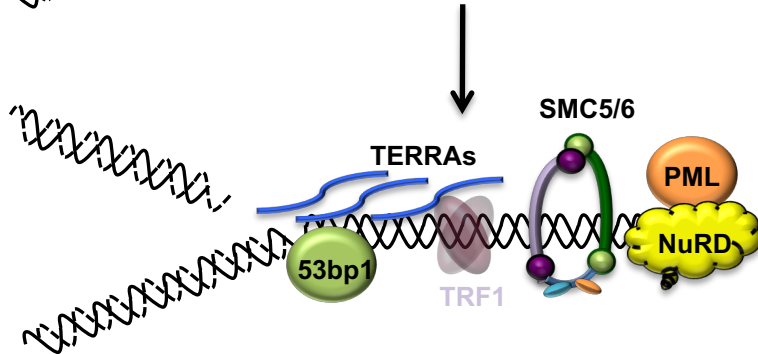

- Fragile telomeres
- Recombination
- APBs formation
- TERRA increase
- BIR

**Break-induced replication repair**

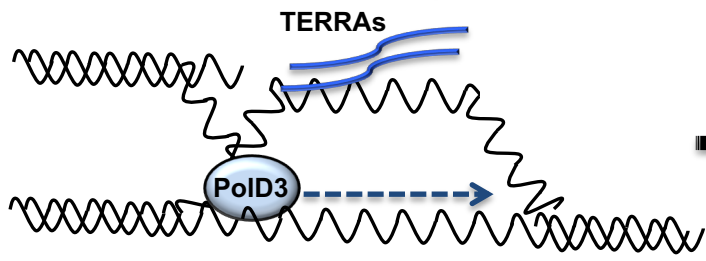

**Resolution**

**A**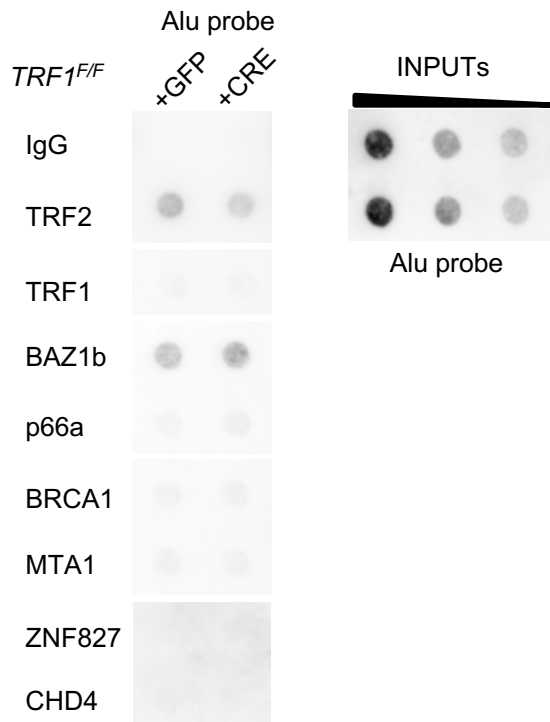**B**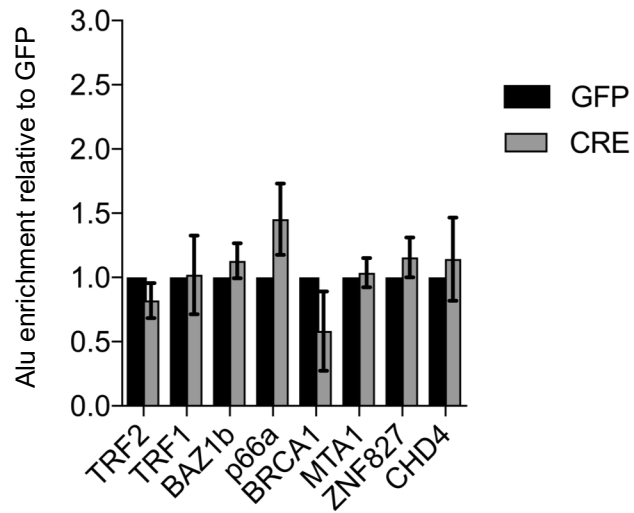

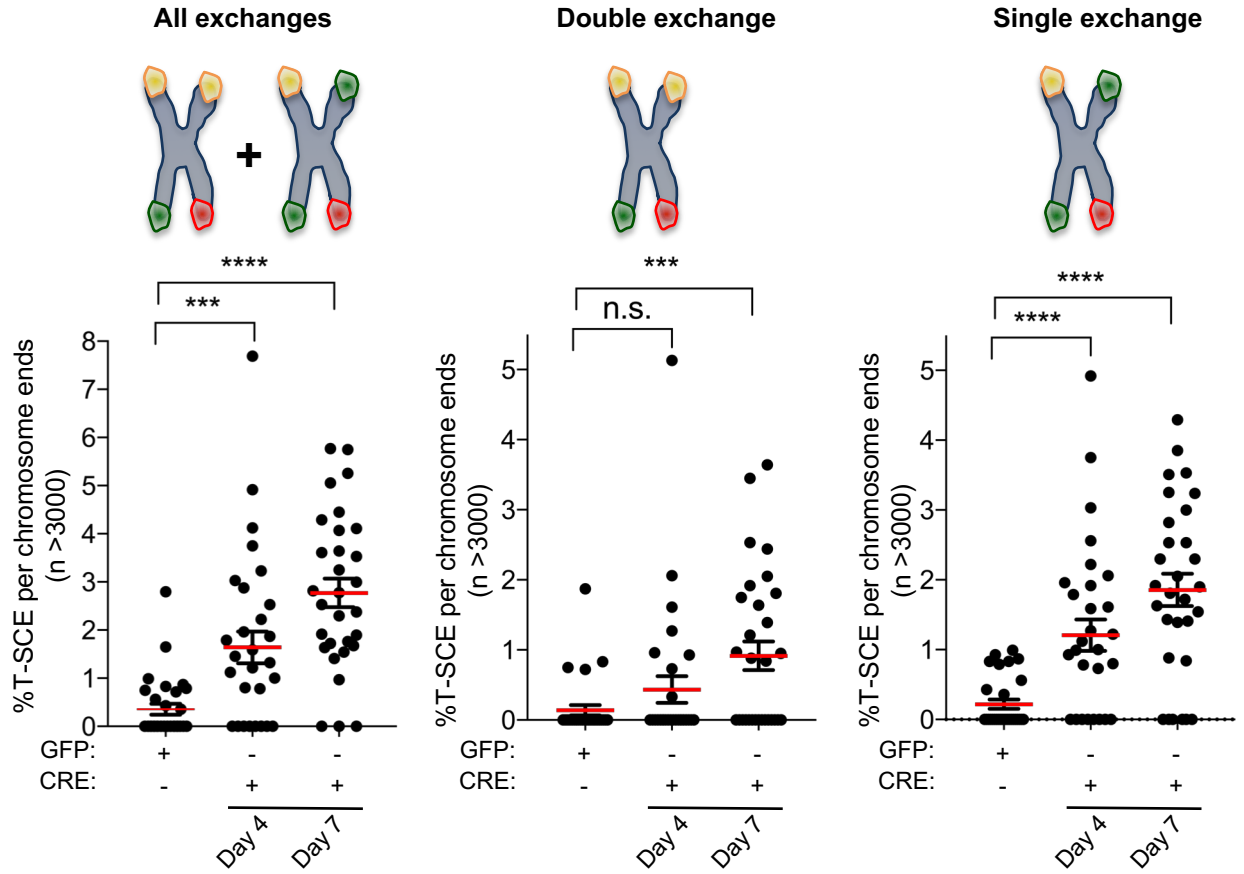

**A**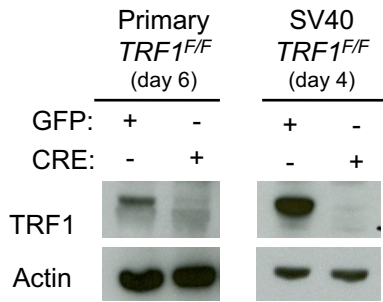**B**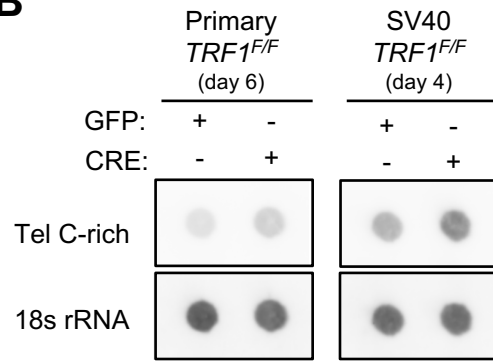**C**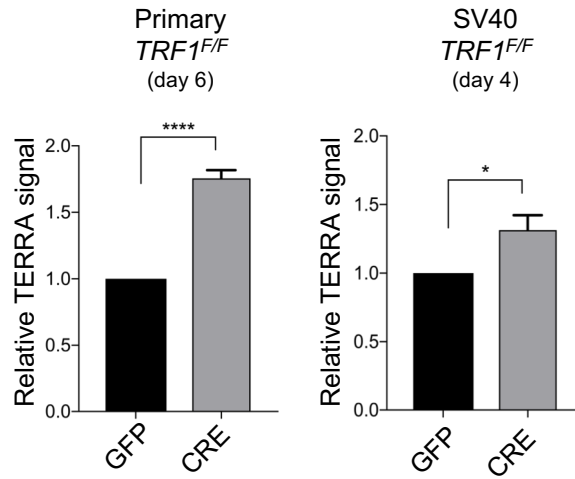**D**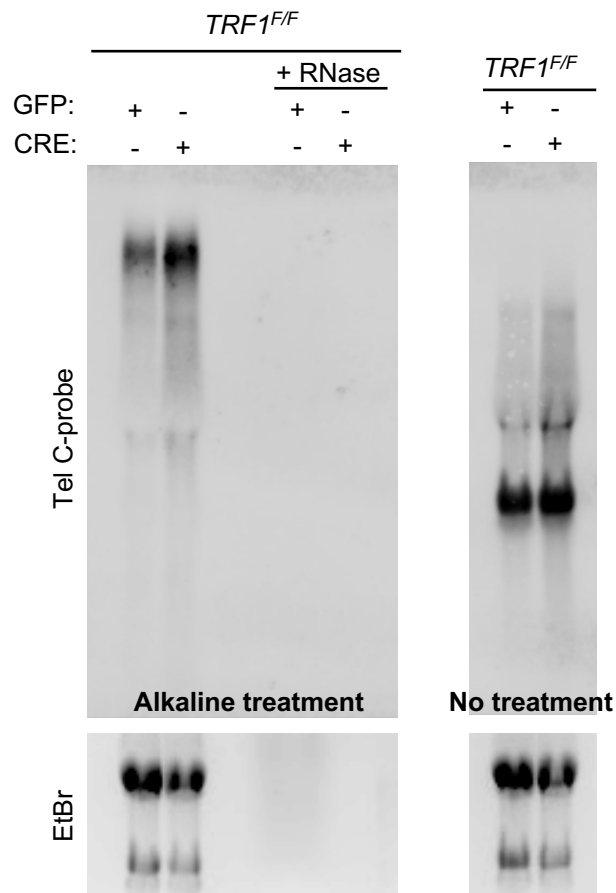

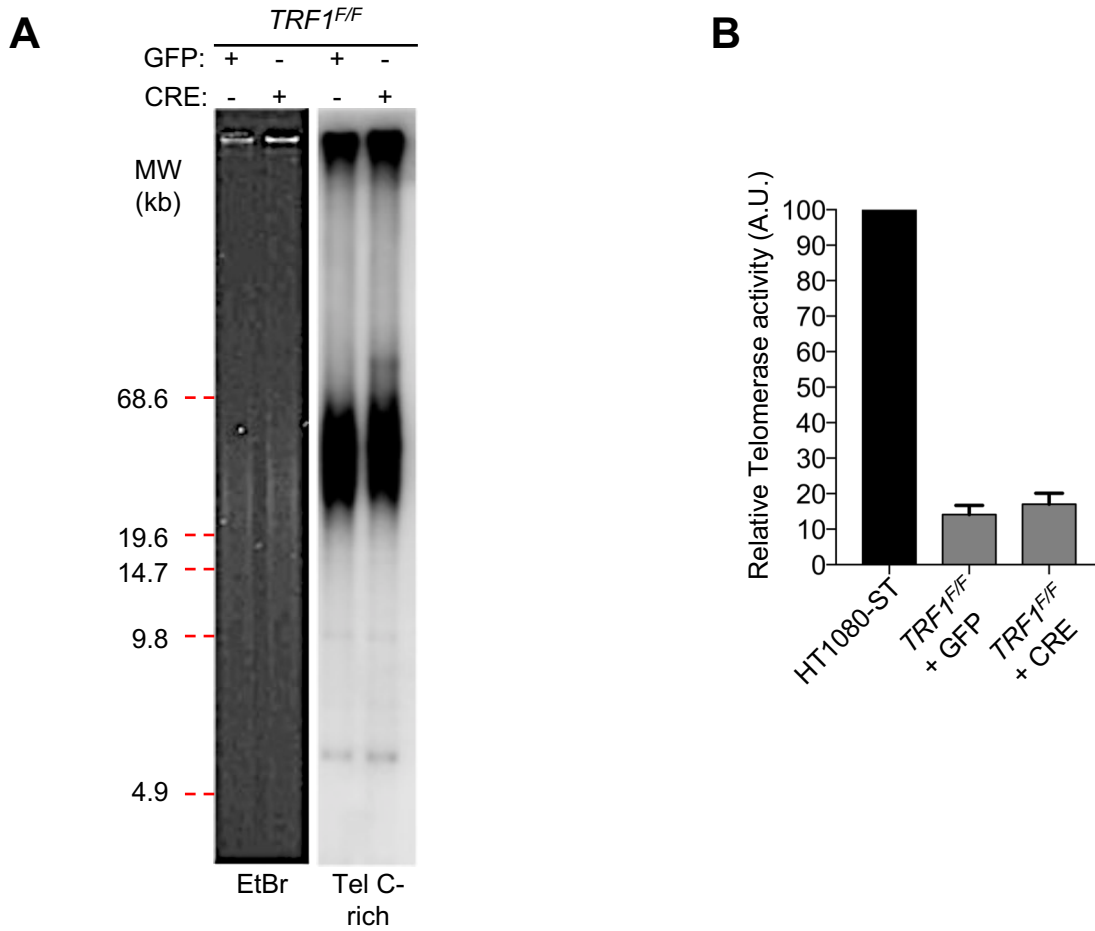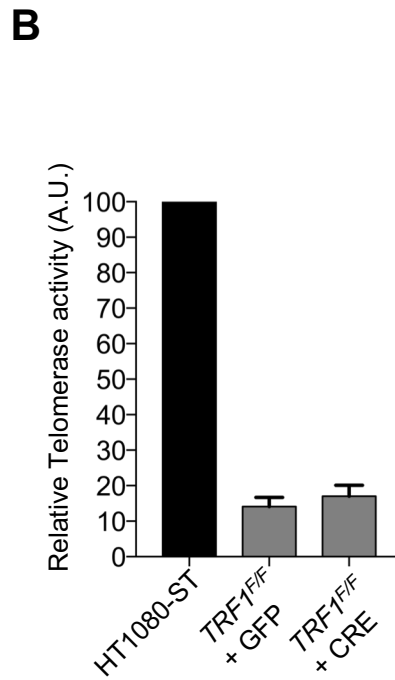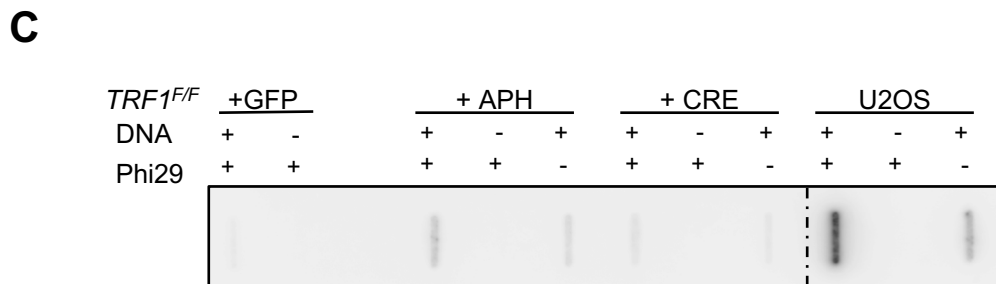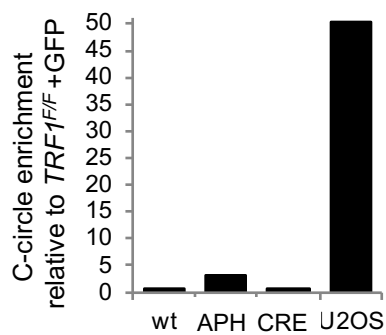

**A**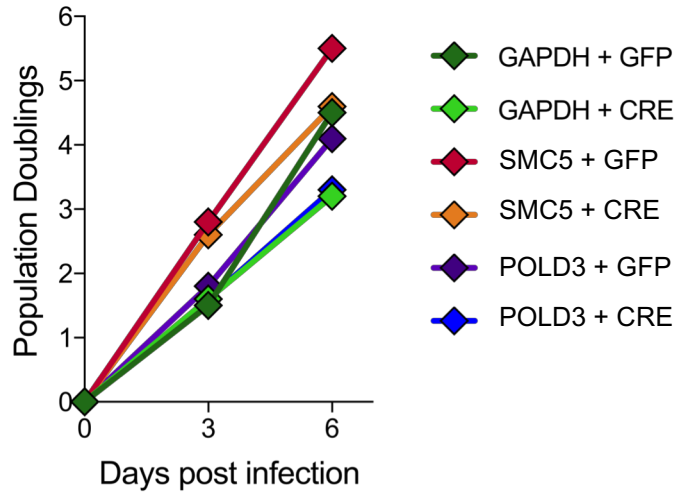**B**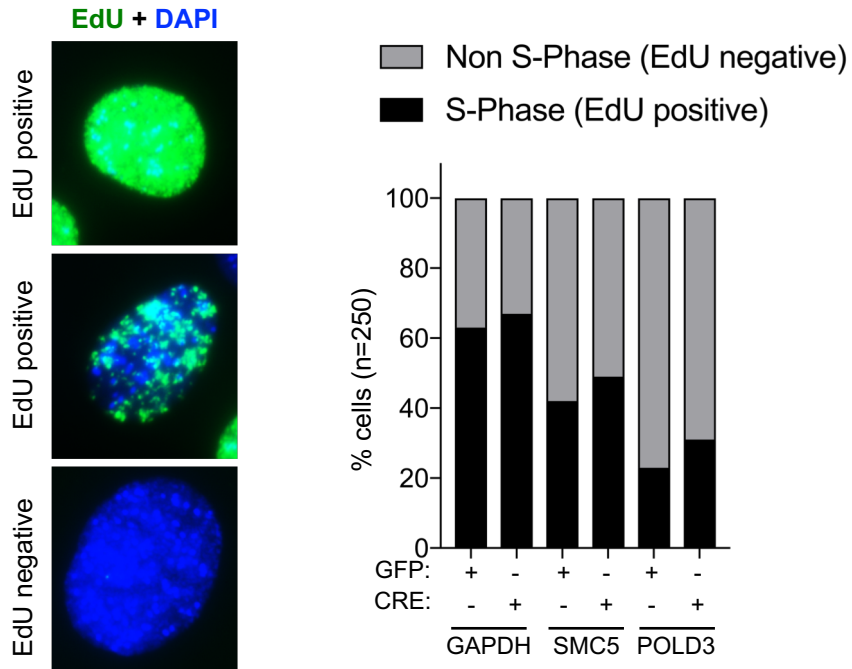

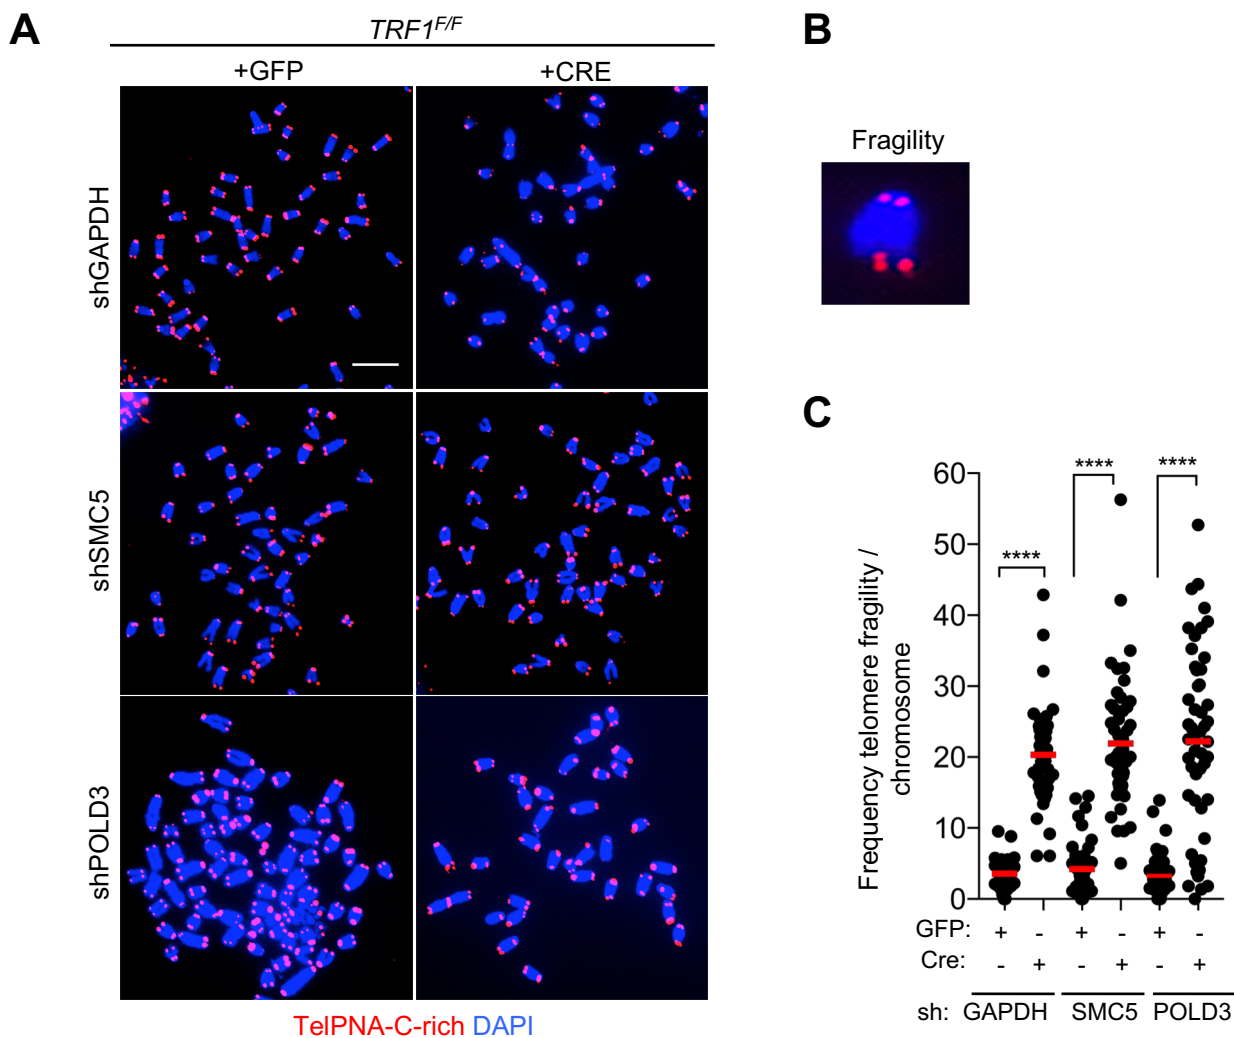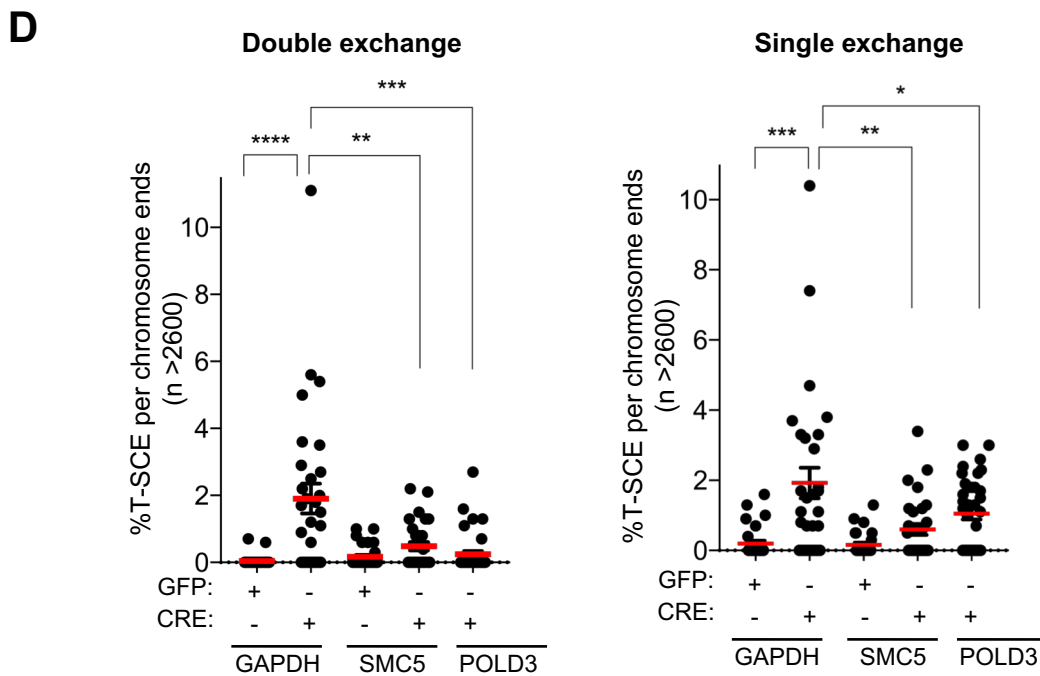

Source: http://biorxiv.org/content/10.1101/697979v1.full.pdf
